# Supplementary material for: A CRISPR knockout screen identifies SETDB1-target retroelement silencing factors in embryonic stem cells
Source: PubMed Central journal article supplement — Genome Res. 2018 Jun;28(6):846–58. doi: 10.1101/gr.227280.117 (PMC5991520; doi:10.1101/gr.227280.117), 2018-06
Supplement: supp_gr.227280.117_Supplemental_Fig_S2_.pdf [file supp_gr.227280.117_Supplemental_Fig_S2_.pdf]

a

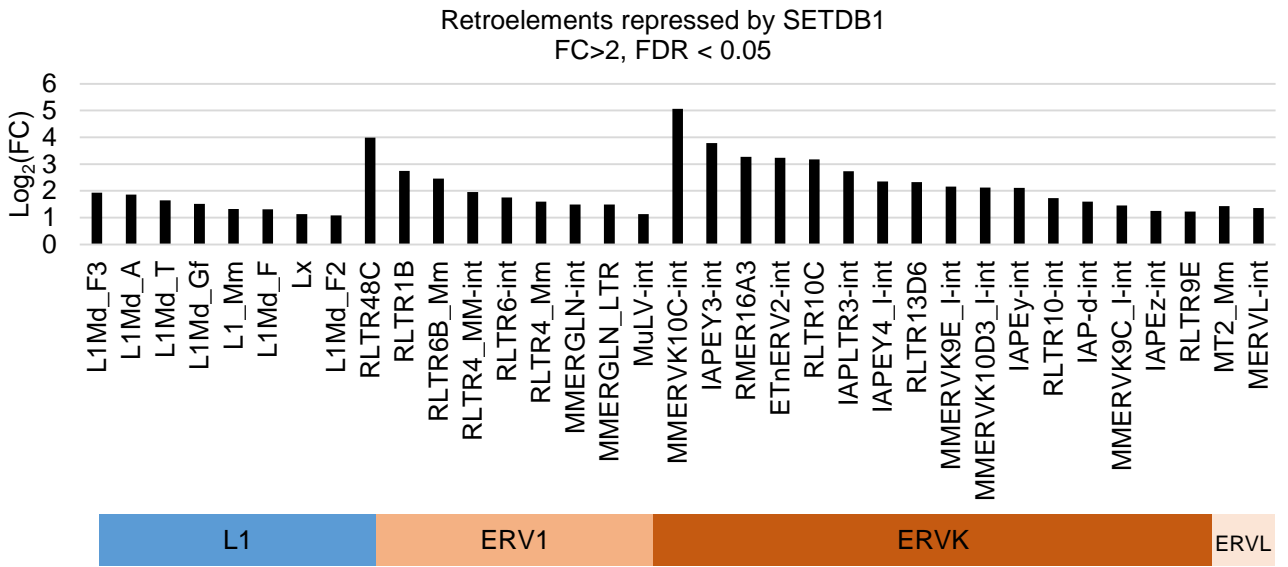

b

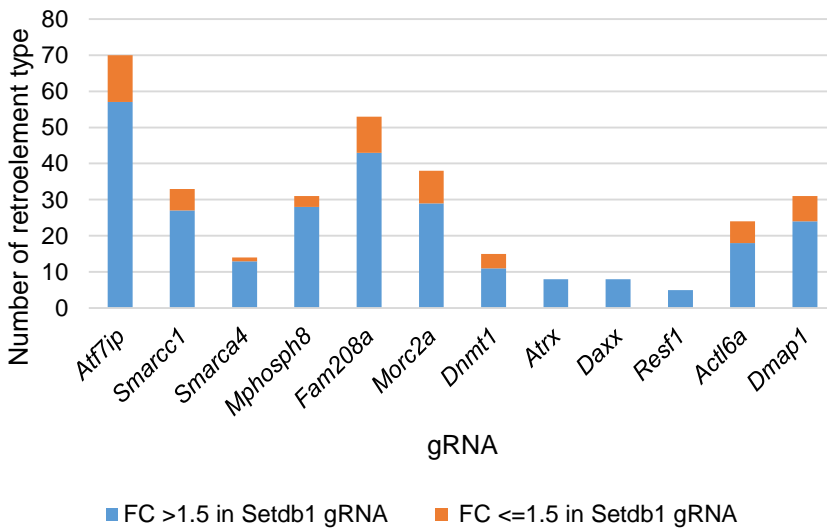

c

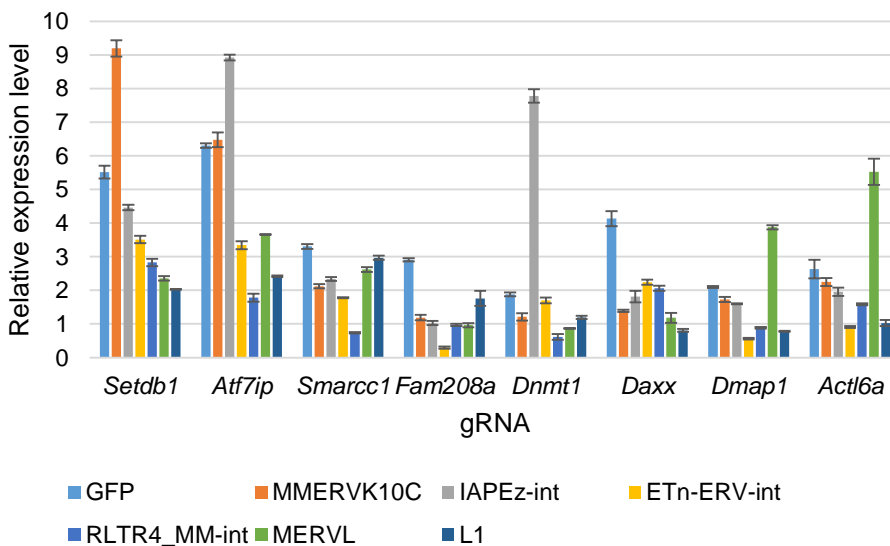

**Supplemental Figure 2. Characterization of target repeats of top 20 genes identified by the gRNA screen and HUSH component genes.** (a) Expression change of retroelements repressed by SETDB1. The repressed retroelements were identified by the following criteria: FDR < 0.05, FC > 2. Y-axis represents  $\log_2$  fold change of retroelement expression in *Setdb1* gRNA plasmid transfected mESCs. (b) Cumulative bar graph of retroelement types derepressed by gRNA plasmid transfection (FC > 1.5). Number of retroelement type, which was derepressed by *Setdb1* gRNA transfection (FC > 1.5) were colored by blue. (c) RT-qPCR analysis retrotransposon expression in each silencing factor depleted mESCs. RNA was extracted at 5 days after the gRNA plasmid transfection. Data represent mean  $\pm$  SE (n = 3).
