# Supplementary material for: A CRISPR knockout screen identifies SETDB1-target retroelement silencing factors in embryonic stem cells
Source: PubMed Central journal article supplement — Genome Res. 2018 Jun;28(6):846–58. doi: 10.1101/gr.227280.117 (PMC5991520; doi:10.1101/gr.227280.117), 2018-06
Supplement: supp_gr.227280.117_Supplemental_Fig_S6.pdf [file supp_gr.227280.117_Supplemental_Fig_S6.pdf]

**a**

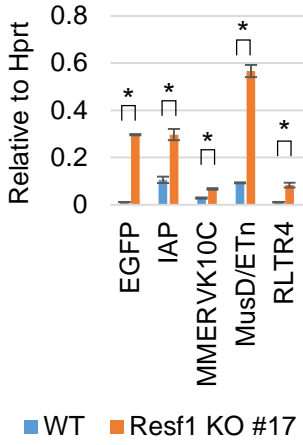

**b**

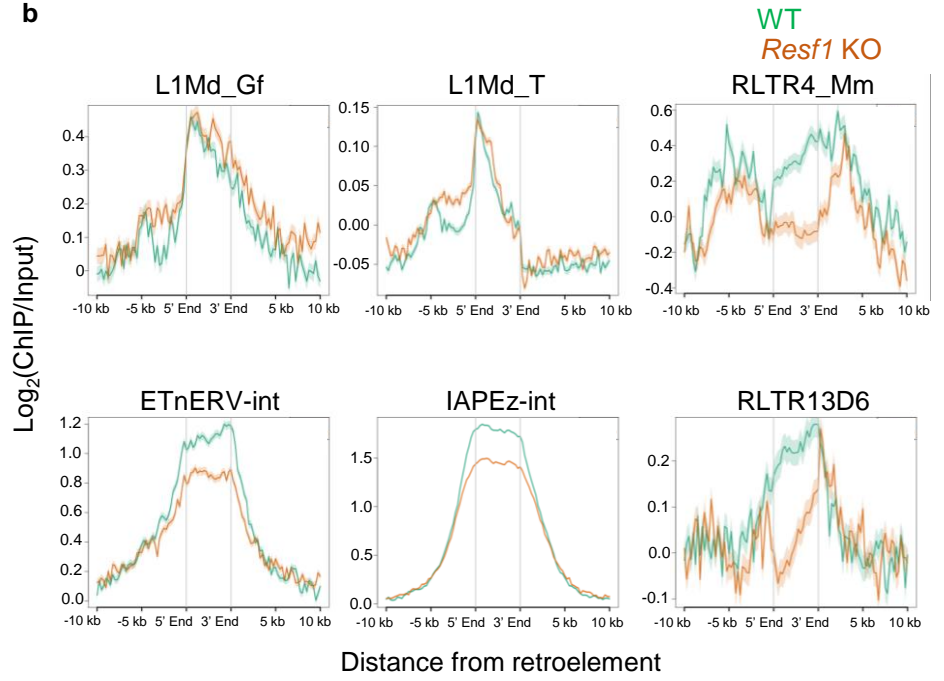

**c**

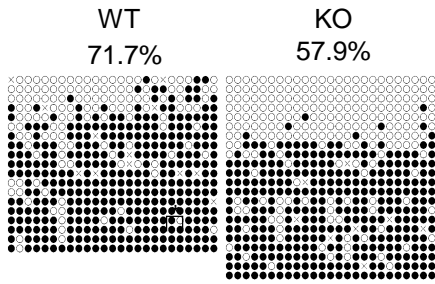

**d**

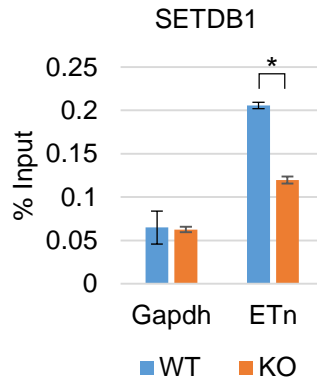

**e**

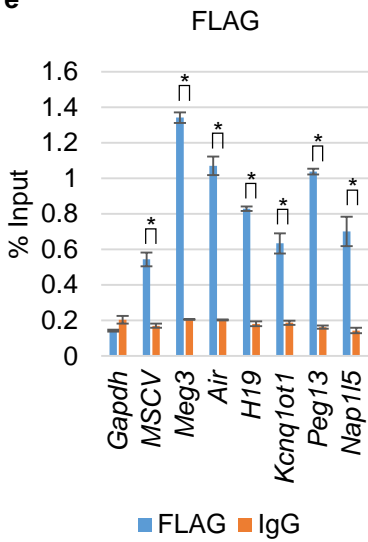

**f**

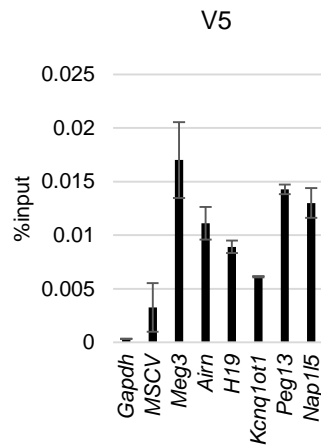

**g**

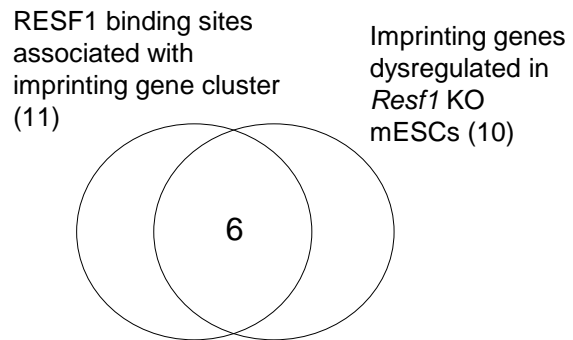

**Supplemental Figure 6. RESF1 regulates imprinted genes and ERVs.** (a) RT-qPCR analysis of expression of ERV retrotransposons in another *Resf1* KO cell line. (b) Enrichment of H3K9me3 ChIP-seq reads on derepressed (RLTR4\_Mm (MULV-LTR), ETnERV-int, IAPez-int (IAPLTR1a\_I\_MM), RLTR13D6) and unaffected (L1Md\_Gf, L1Md\_T) retroelements in *Resf1* KO ESCs. (c) DNA methylation level of ETn in WT and *Resf1* KO ESCs analyzed by bisulfite sequencing. (d) Enrichment of SETDB1 on ERV ETn promoter analyzed by ChIP-qPCR. In *Resf1* KO ESCs, enrichment of SETDB1 on ETn promoter was reduced. (e,f) ChIP-qPCR confirmation of RESF1 binding around imprinted genes. ChIPs were performed with *Resf1* KO cell line stably expressing FLAG- (e) or V5- (f) tagged RESF1. Anti-FLAG or V5 Ab were used. (g) Overlap between imprinted gene cluster with RESF1 binding sites and imprinted genes dysregulated in *Resf1* KO ESCs. 6 of those genes were located in imprinted gene clusters with RESF1 binding sites. Data represent mean  $\pm$  SE (n = 3). \*P-value < 0.01 (t-test).
