# Supplementary material for: A CRISPR knockout screen identifies SETDB1-target retroelement silencing factors in embryonic stem cells
Source: HighWire-hosted journal article supplement (doi:10.1101/gr.227280.117), 2018-05-04
Supplement: Supplemental_Methods_.docx [file Supplemental_Methods_.docx]

**Contents:**

**A CRISPR Knockout Screen Identifies SETDB1-target Retroelement Silencing Factors in Embryonic Stem Cells**

Kei Fukuda1, Akihiko Okuda2, Kosuke Yusa3*and Yoichi Shinkai1*

1Cellular Memory Laboratory, RIKEN, 2-1 Hirosawa, Wako, Saitama 351-0198, Japan

2Division of Developmental Biology, Research Center for Genomic Medicine, Saitama Medical University, 1397-1 Yamane Hidaka Saitama 350-1241, Japan

3Wellcome Trust Sanger Institute, Hinxton, Cambridge, CB10 1SA, United Kingdom

*Correspondence: [yshinkai@riken.jp](mailto:yshinkai@riken.jp) (Y.S.), [ky1@sanger.ac.uk](mailto:ky1@sanger.ac.uk) (K.Y.)

**Contents:**

**Supplemental Methods 1 - Cell culture (p3)**

**Supplemental Methods 2 – Native ChIP (p3)**

**Supplemental Methods 3 – Crosslinked ChIP (p4)**

**Supplemental Methods 4 - DNA methylation analysis (p5)**

**Supplemental Methods 5 – FAIRE (p5)**

**Supplemental Methods 6 - Western blotting (p6)**

**Supplemental Methods 7 - Immunofluorescence analysis (p6)**

**Supplemental Methods 8 - cDNA synthesis (p6)**

**Supplemental Methods 9 – qPCR (p6)**

**Supplemental Methods 10 – RNA-seq analysis (p7)**

**Supplemental Methods 11 – ChIP-seq analysis (p7)**

**Supplemental Methods 12 – Knockdown analysis (p7)**

**Supplemental Methods 13 – Peptide binding assay (p8)**

**Supplemental Methods 14 – Lentivirus infection (p8)**

**Supplemental Methods 15 – Antibodies (p9)**

**Supplemental Methods 16 – Oligonucleotides (p9)**

**References (p10)**

**Supplemental Methods 1 - Cell culture**

Embryonic stem cells were maintained in Dulbecco's modified Eagle's medium (Sigma)containing 10% Knockout SR (Invitrogen), 1% fetal bovine serum (bio west), MEM Non-Essential Amino Acids Solution (Gibco), 0.1% LIF and 2-Mercaptoethanol (Nacalai tesque) described as ES medium hereafter). To validate gRNA, clone 7 was transfected pKLV2-U6gRNA-PGKpuroBFP using Lipofectamine 2000 reagent (Invitrogen). The transfectant cells were selected in the ES medium containing puromycin (1 g/ml) and GFP expression was investigated by flow cytometry at 5 days after the transfection. *Morc2a* and *Resf1* deficient clones were isolated after the puromycin selection. To generate ES cells stable expressing MORC2A or RESF1, the expression vectors designated as pPB-CAG-3xFLAG-MORC2A-IRES-puro, pPB-CAG-3xFLAG-MORC2AATPase(24-134)-IRES-puro, pPB-CAG-3xFLAG-MORC2ACW(495-542)-IRES-puro, pPB-CAG-3xFLAG-MORC2A DD68/69AA-IRES-puro, pPB-CAG-3xFLAG-MORC2ACL(793-852)-IRES-puro, pPB-CAG-V5-MORC2A-IRES-blast, pPB-CAG-3xFLAG-RESF1-IRES-puroor pPB-CAG-V5-RESF1-IRES-blast were introduced with pCAG-PBase vector ([Wang et al., 2008](#_ENREF_5)) into the corresponding KO ES cells by using Lipofectamine 2000 reagent (Invitrogen). The stable transfectant clones expressing FLAG-tagged or V5-tagged transgenes were selected in the ES medium containing puromycin (1 mg/ml) or blasticidin (7 g/ml), respectively.

**Supplemental Methods 2 – Native ChIP**

2x106 mESCs were suspended in order of 50 µl of Buffer 1 (60 mM KCl, 15 mM NaCl, 5 mM MgCl2, 0.1 mM EGTA, 15 mM Tris-HCl pH 7.5, 0.3 M sucrose, 0.5 mM DTT, protease inhibitor cocktail), 50 µl of Buffer 2 (60 mM KCl, 15 mM NaCl, 5 mM MgCl2, 0.1 mM EGTA, 15 mM Tris-HCl pH 7.5, 0.3 M sucrose, 0.5 mM DTT, 1% NP40, protease inhibitor cocktail) and 800 µl of Buffer 3 (60 mM KCl, 15 mM NaCl, 5 mM MgCl2, 0.1 mM EGTA, 15 mM Tris-HCl pH 7.5, 1.2 M sucrose, 0.5 mM DTT, protease inhibitor cocktail) to extract chromatin fraction. After spinning at 4℃ for 5 min at 8,500 rpm, the pellet was suspended in 200 µl Mnase buffer (50mM Tris-HCl pH7.5, 4mM MgCl2, 1 mM CaCl2, PMSF). Chromatin was fragmented for 15 min at 37℃ using 0.3U MNase (TAKARA) and the reaction was stopped by 10 µl of 0.5 M EDTA. After spinning at 4℃ for 5 min at 8,500 rpm, 1.8 ml incubation buffer (50 mM NaCl, 20 mM Tris-HCl pH 7.5, 5 mM EDTA, 0.01% NP40, PMSF) was added to the supernatant and 390 µl of the digested chromatin solution was taken as input. 780 µl of the remaining solution was added to anti-mouse IgG Dynabeads (Veritas), which was conjugated with anti-H3K4me3 or H3K9me3 antibody by incubation together on ice for 1h. After rotating the solution at 4℃ for O/N, the beads were sequentially washed by Wash A (75 mM NaCl, 50 mM Tris-HCl pH7.5, 10 mM EDTA, 0.01% NP40), Wash B (100 mM NaCl, 50 mM Tris-HCl pH7.5, 10 mM EDTA, 0.01% NP40), Wash C (175 mM NaCl, 50 mM Tris-HCl pH7.5, 10 mM EDTA, 0.01% NP40), and were suspended in salting method buffer (20 mM Tris pH8.0, 10mM EDTA, 400 mM NaCl). Input and N-ChIP samples were de-crosslinked by RNaseA, SDS and Protease K treatment, and purified by QIAquick PCR purification kit (Qiagen).

**Supplemental Methods 3 – Crosslinked ChIP**

1x107 mESCs were crosslinked with 1% formaldehyde at 25℃ for 10 min and the reaction was stopped by 2.5 M glycine. After spinning for 5 min at 8,500 rpm, the pellet was suspended by 500 µl of lysis buffer (10 mM NaCl, 10 mM Tris-HCl pH 7.5, 0.5% NP40, protease inhibitor) on ice for 5 min. After spinning at 4℃ for 5 min at 8,500 rpm, the pellet was suspended by 100 µl of 1% SDS lysis buffer (50 mM Tris-HCl pH 8.0, 10 mM EDTA, 1% SDS, protease inhibitor) on ice for 10 min. After adding 400 µl of 1% Triton buffer (150 mM NaCl, 15 mM Tris-HCl pH8.0, 1 mM EDTA, 1% Triton X-100, protease inhibitor), chromatin was sonicated using Bioruptor USD-250 to an average size of 300-500 bp. After spinning at 4℃ for 10 min at 15,000 rpm, 600 µl of 1% Triton buffer was added to the supernatant, and 100 µl of the sonicated chromatin solution was taken as input. The remaining solution was added to anti-mouse IgG Dynabeads (Veritas), which was conjugated with anti-Flag or V5 antibody by incubation together on ice for 1h. After rotating the solution at 4℃ for O/N, the beads were sequentially washed by low salt buffer (150 mM NaCl, Tris-HCl pH8.0, 2 mM EDTA, 1% Triton X-100, 0.1% SDS), high salt buffer (500 mM NaCl, Tris-HCl pH8.0, 2 mM EDTA, 1% Triton X-100, 0.1% SDS), LiCl buffer (25 mM LiCl, 10 mM Tris-HCl pH8.0, 1 mM EDTA, 1% NP40, 1% DOC), TE, and were suspended in Salting method buffer (20 mM Tris pH8.0, 10mM EDTA, 400 mM NaCl). Input and ChIP samples were de-crosslinked by RNaseA, SDS and Protease K treatment, and purified by QIAquick PCR purification kit (Qiagen).

**Supplemental Methods 4 - DNA methylation analysis**

Bisulphite treatment of genomic DNA was carried out with MethylCode Bisulfite Conversion Kit (Invitrogen) following the manufacturer’s instructions. MSCV or ETn were amplified from bisulfite-converted genomic DNA by PCR using primers shown in Supplemental Table S4 and EpiTaq HS (TAKARA). The PCR amplicons were purified by QIAquick PCR Purification Kit (Qiagen) and sequenced. Results of bisulfite sequencing were analyzed by QUMA (<http://quma.cdb.riken.jp/>) ([Kumaki et al., 2008](#_ENREF_2)).

**Supplemental Methods 5 - FAIRE**

5x106 mESCs suspended in PBS with 10% FBS were fixed with 1% formaldehyde for 10min at room temperature (RT), then, the fixation stopped by adding 2.5 M glycine (final 210 mM). Fixed cells were suspended in 500 µl of lysis buffer (10 mM Tris-HCl pH 7.5, 10 mM NaCl, 0.5% NP-40, protease inhibitor cocktail) and spin down at 4℃ for 5 min at 8,500 rpm. The pellet was re-suspended in 500 µl of lysis buffer and incubated on ice for 5 min. After spinning at 4℃ for 5 min at 8,500 rpm, the pellet was suspended in 100 µl of SDS lysis buffer (50 mM Tris-HCl pH 8.0, 10 mM EDTA, 1% SDS, protease inhibitor cocktail) and incubated on ice for 10 min. After adding 400µl Triton buffer (150 mM NaCl, 15 mM Tris-HCl pH 8.0, 1 mM EDTA, 1% Triton X-100, protease inhibitor cocktail), the extract was sonicated using a Bioruptor for 12 min (30 seconds on, 30 seconds off). After spinning at 4℃ for 10 min at 15,000 rpm, the supernatant was transferred to a new 1.5 ml tube and 600 µl Triton buffer was added to it. 100 µl of the extract was taken as input and he remaining extract was processed by phenol/chloroform extraction to recover DNA not bound by nucleosome as following: 500 µl of phenol:chloroform:isoamyl alcohol (25:24:1) was added to 500 µl of the remaining extract. After spinning at room temperature for 10 min at 12,000 rpm, the upper aqueous phase was transferred to a new 1.5 ml tube. The same procedure was repeated once again on the aqueous layer. Then, 200 µl of chloroform/isoamyl alcohol (24:1) was added to the aqueous layer. After spinning at RT for 5 min at 12,000 rpm, 1/10 volume 3M sodium acetate (pH 5.2), 2 volume 95% ethanol and 1 µl of 20 mg/ml glycogen were added to the aqueous layer and incubated for 30 min at -80℃ followed by centrifugation at 4℃ for 15 min at 12,000 rpm. After remove the supernatant, the precipitated DNA was washed by 500 µl ice-cold 70% ethanol and eluted by 100ul of 10mM Tris-Cl, pH7.4. Input and FAIRE samples were de-crosslinked by RnaseA, SDS and Protease K treatment, and purified by QIAquick PCR purification kit (Qiagen).

**Supplemental Methods 6 - Western blotting**

Briefly, cell were suspended in RIPA buffer (50mM Tris-HCl pH 8.0, 450mM NaCl, 0.5w/v% sodium deoxycholate, 0.1w/v% sodium dodecyl sulfate, 1.0w/v% NP-40) and sonicated. The extract was incubated for 30 min on ice, and then incubated at 95℃ for 5 min. The extract was loaded and run on SDS-PAGE gel as standard protocols.

**Supplemental Methods 7 - Immunofluorescence analysis**

2x104 cells were seeded on laminin coated 12 well Chamber (Ibidi) the day before fixation. The cells were fixed with 4% paraformaldehyde for 10 min at room temperature, permeabilized with 0.1% Triton X-100 for 10 min, blocked with 3% BSA 0.1% Tween20 in PBS and incubated overnight with primary antibodies at 4℃. Anti-mouse IgG conjugated with Alexa Fluor 568 (ThermoFisher SCIENTIFIC) or anti-rabbit IgG conjugated with Alexa Fluor 488 (ThermoFisher SCIENTIFIC) were used as secondary antibodies. The nuclei were counterstained with DAPI, observed under fluorescence microscopy and analyzed Olympus FluoViewTM FV1000 (Olympus).

**Supplemental Methods 8 - cDNA synthesis**

RNA was isolated by RNeasy Plus Mini Kit (Qiagen) following manufacturer’s instructions. cDNA synthesis was performed with Omniscript RT Kit (Qiagen).

**Supplemental Methods 9 – qPCR**

qPCR was carried out using Power SYBR Green PCR Master Mix (ThermoFisher SCIENTIFIC) on StepOnePlusTM (ThermoFisher SCIENTIFIC). All qPCR data is represented as the mean +/- standard deviation of three replicates. The differences between two groups were compared by using one-tailed Student’s t- test. *p*=0.05 was used as the cutoff for statistical significance.

**Supplemental Methods 10 – RNA-seq analysis**

Total RNA was prepared as described above. Sequencing libraries for transcriptome analysis were prepared using TruSeq RNA Library Preparation Kit (Illumina Inc.) and sequenced using HiSeq 1500 (Illumina Inc.). Raw FastQ data were trimmed with Trim Galore (v0.3.7, default parameters) (<http://www.bioinformatics.babraham.ac.uk/projects/trim_galore/>) and mapped to the mouse GRCm38 genome assembly and UCSC genes database from the UCSC genome browser using TopHat (v2.1.1) ([Trapnell et al., 2009](#_ENREF_4)). After read mapping, mapped reads were analyzed by TEtranscripts (v1.4.11, default parameters) ([Jin et al., 2015](#_ENREF_1)) to calculate gene and repeat expression levels and identify DE genes and repeats (adj. P-value < 0.05, FC > 2). UCSC genes database and RepeatMasker track from the UCSC genome browser were used for the calculation of gene and repeat expression levels, respectively.

**Supplemental Methods 11 – ChIP-seq analysis**

ChIP-seq libraries were prepared using TruSeq DNA HT Sample Prep Kit (Illumina Inc.) and sequenced using HiSeq 1500 (Illumina Inc.). Raw FastQ data were processed as described above. Processed reads were mapped to the mouse GRCm38 genome assembly or the human GRCh37 genome assembly using Bowtie (v4.4.6) ([Langmead et al., 2009](#_ENREF_3)). Peaks were identified by MACS (v1.4.1) ([Zhang et al., 2008](#_ENREF_6)). UCSC genes database and RepeatMasker track from the UCSC genome browser were used for gene and repeat annotations, respectively.

**Supplemental Methods 12 – Knockdown analysis**

siSetdb1 and siCtr were purchased from Dharmacon and Invitrogen, respectively (siSetdb1: Mouse Setdb1 (84505) siRNA, Dharmacon; siCtr: 452001, invitrogen). siRNA transfection to mESC expressing V5-RESF1 was performed by Lipofectamine RNAiMAX (invitrogen) according to the manufactures instruction. siRNA was transfected every 2 days and we collected the transfected cells for the downstream analysis at day 6 after the first siRNA transfection.

**Supplemental Methods 13 – Peptide binding assay**

The zinc finger CW domain of MORC2A (residues 495-542) was subcloned in to a pGEX-6P-3 vector. N-terminal GST-tagged fusion protein was overexpressed in *Escherichia coli* BL21 at 18℃ and purified by Glutathione Sepharose 4B (GE Healthcare). 1 pmol of biotinylated histone peptides were conjugated to 10 µl of DynabeadsTM M-280 Streptavidin (ThermoFisher SCIENTIFIC) by rotating at 4℃ for 1h in 500 µl of peptide binding buffer (20 mM Tris-HCl pH 8.0, 150 mM NaCl, 1 mM EDTA, 0.5% NP40). After washing beads by 500 µl of peptide binding buffer, beads were rotated at 4℃ for 1h together with 30 ng GST-tagged protein dissolved in 150 µl of peptide binding buffer. After washing beads by 500 µl of peptide binding buffer three times, bound proteins were collected by boiling and were analyzed by western blotting.

**Supplemental Methods 14 – Lentivirus infection**

Lentivirus-based vector expressing gRNA was generated by transient co-transfection of 293FT cells with a three-plasmid combination. Briefly, 293FT cells were plated at 8x105 cells / well in a 6 cm dish the day before the transfection. 2 g psPax2, 0.4 g pMD2.G and 0.4 g pKLV2-U6gRNA-PGKpuro2ABFP were transfected to 293FT cells by Lipofectamine 2000 (Thermo Fisher Scientific) following the manufacturer’s instructions, and the culture supernatant was collected at 2 days after the transfection. mESCs were transduced with lentiviral supernatant in the presence of 8 g/ml polybrene and selected by 1 g/ml puromycin.

**Supplemental Methods 15 - Antibodies**

For western blotting, antibodies specific for FLAG (F1804, Sigma-Aldrich), histone H3 (07-690, EMD Millipore), H3K9me3 (2F3), -TUBULIN (T6168, Sigma-Aldrich), SMARCC1 (11956, Cell Signaling Technology), SMARCA4 (ab110641, Abcam), SETDB1 (Cp10377, Cell Applications), KAP1 (ab22553, Abcam) and ATRX (sc-15408, Santa Cruz Biotechnology) were used as primary antibody. HRP-linked anti-Rabbit IgG (NA934, GE Healthcare) and HRP-linked anti-Mouse IgG (NA931, GE Healthcare) were used as secondary antibody. For immunofluorescence analysis, antibodies specific for FLAG (F1804, Sigma-Aldrich; F7425, Sigma-Aldrich), DNMT1 (sc-20701, Santa Cruz Biotechnology) and -TUBULIN (ab11316, Abcam) were used. For ChIP analysis, antibodies specific for FLAG (F1804, Sigma-Aldrich), V5 (46-0705, invitrogen), SETDB1 (11231-1-AP, Proteintech), H3K9me3 (2F3), H3K4me3 (16H10) and IgG (sc-2025, Santa Cruz Biotechnology) were used.

**Supplemental Methods 16 – Oligonucleotides**

Oligonucleotide sequences for PCR primers and production of gRNA targeting vectors are listed in Supplemental Table S4.

# References

Jin, Y., Tam, O.H., Paniagua, E., and Hammell, M. (2015). TEtranscripts: a package for including transposable elements in differential expression analysis of RNA-seq datasets. Bioinformatics *31*, 3593-3599.

Kumaki, Y., Oda, M., and Okano, M. (2008). QUMA: quantification tool for methylation analysis. Nucleic Acids Res *36*, W170-175.

Langmead, B., Trapnell, C., Pop, M., and Salzberg, S.L. (2009). Ultrafast and memory-efficient alignment of short DNA sequences to the human genome. Genome Biol *10*, R25.

Trapnell, C., Pachter, L., and Salzberg, S.L. (2009). TopHat: discovering splice junctions with RNA-Seq. Bioinformatics *25*, 1105-1111.

Wang, W., Lin, C., Lu, D., Ning, Z., Cox, T., Melvin, D., Wang, X., Bradley, A., and Liu, P. (2008). Chromosomal transposition of PiggyBac in mouse embryonic stem cells. Proc Natl Acad Sci U S A *105*, 9290-9295.

Zhang, Y., Liu, T., Meyer, C.A., Eeckhoute, J., Johnson, D.S., Bernstein, B.E., Nusbaum, C., Myers, R.M., Brown, M., Li, W.*, et al.* (2008). Model-based analysis of ChIP-Seq (MACS). Genome Biol *9*, R137.
