# Supplementary material for: A CRISPR knockout screen identifies SETDB1-target retroelement silencing factors in embryonic stem cells
Source: HighWire-hosted journal article supplement (doi:10.1101/gr.227280.117), 2018-05-04
Supplement: Supplemental_Table_S1.xlsx [file Supplemental_Table_S1.xlsx]

## Sheet: Sheet1
Supplemental Table S1: Result of CRISPR Knockout Screen, Related to Figure 1
Gene	P-value
Atrx	2.6699e-07
Smarcb1	2.6699e-07
Setdb1	2.6699e-07
Atf7ip	2.6699e-07
Smarcc1	2.6699e-07
Dnmt1	2.6699e-07
Daxx	2.6699e-07
Smarca4	2.6699e-07
Sae1	8.0096e-07
Actl6a	1.8689e-06
Morc2a	2.4029e-06
Zfp445	5.6068e-06
Smarce1	9.8786e-06
Dmap1	2.216e-05
Mbd1	4.4587e-05
Dgcr8	6.5412e-05
2810474O19Rik	6.5412e-05
Gins2	8.0897e-05
D2Wsu81e	9.0509e-05
D14Abb1e	0.00011507
Ago2	0.00012308
Ogt	0.0001359
Nacc1	0.00014177
Atmin	0.00017595
Gid8	0.00018662
Arid1a	0.0001909
Nudcd3	0.00020211
1700019D03Rik	0.00020959
Ep400	0.00022774
Cramp1l	0.00023041
AI846148	0.0002491
Masp1	0.00028434
Zfp592	0.00028648
Sdr42e1	0.00031425
Trmt61a	0.00033721
Gpsm3	0.00037085
E2f4	0.00039327
Acd	0.00047123
Cyp4x1	0.00049366
Trim28	0.00054919
Trip12	0.00055774
Lasp1	0.0005807
Fn3krp	0.00079322
Huwe1	0.00080871
Cecr6	0.00086691
Zkscan7	0.00087385
Tbc1d10b	0.0009972
Dolpp1	0.00101
Glis3	0.0010554
Ppm1b	0.0011312
Slc27a4	0.0011585
Pcdh19	0.0011974
Tmem231	0.0012802
Ccdc146	0.0013016
Icam1	0.0013694
2610008E11Rik	0.0013817
P4ha2	0.0013993
Svil	0.0014164
Slc16a2	0.0014212
Fam118b	0.0014821
Rtn2	0.0015365
Crb3	0.0015365
Pom121	0.0015899
Pard6b	0.0016001
Ube4b	0.0016059
Zfp217	0.0016369
Aqp3	0.0017934
Rnmtl1	0.0018104
Carm1	0.0019899
Zfc3h1	0.002004
Cldn8	0.0020849
Cln8	0.0021143
Spin1	0.0021191
Kdm5c	0.0021453
Stk36	0.0022542
Lhfp	0.0022755
Ephx4	0.0022921
0610009B22Rik	0.0023022
Dhps	0.0023167
Skor2	0.0024571
Scn1b	0.0024774
H2-T24	0.0024934
Myc	0.0025601
Cdc42bpb	0.0026787
Abhd8	0.0026824
Pot1a	0.0027545
Terf1	0.0027785
Fnbp4	0.0028197
Tmc8	0.0028966
Lias	0.0029249
Itga2b	0.0029644
Irf7	0.0030098
Cyp2c29	0.0030103
Hnf4g	0.0032399
Tubb6	0.0032415
Inf2	0.003296
Vmn1r170	0.0033205
Clpb	0.0033333
Sumo2	0.0033803
Mrgprb8	0.0033857
Ido1	0.0034076
Zmym2	0.0034492
Cers4	0.0034791
Rbpjl	0.003509
Myog	0.0035336
Acsl1	0.0035523
Abca2	0.0036842
Krt24	0.0037098
Svs4	0.0037771
Pknox1	0.0037963
Ilf3	0.0038278
Leprel1	0.0038417
Orai3	0.0039373
Slc22a23	0.0041215
Rnaseh2b	0.0041348
Arid2	0.0041594
Nanos3	0.0042254
Ankrd9	0.0042422
Mrpl22	0.0042998
Gm166	0.004515
Sorcs3	0.004522
Fgd3	0.0045385
Smpd1	0.004554
1810026J23Rik	0.0045583
Snx10	0.0046117
Trim33	0.0046459
Dnlz	0.0046758
Cabp7	0.0047479
Cblc	0.0047938
Klra3	0.004798
Calcoco2	0.0048862
Senp6	0.0049417
Rad54l	0.0050223
Rai14	0.0051083
Tcap	0.0052514
Icam4	0.005276
Zdhhc24	0.00534
Mcm5	0.0053422
Pcbp2	0.0054351
Gan	0.0054911
Ppp1r36	0.005497
Slco6b1	0.0055419
Fam46a	0.0055461
Nkx2-6	0.0055536
Abcb1b	0.0055547
Slc22a16	0.0055728
Rbms3	0.0055937
Wrap53	0.0056588
Ppm1h	0.005662
Gal3st4	0.0057314
Btbd17	0.0057693
Ehmt1	0.0058153
Lrrc73	0.0058227
Otud6a	0.0058655
Creld2	0.0059408
Rergl	0.0059584
Csnk2a2	0.0059974
Tubgcp3	0.0062852
Hs3st1	0.0062942
Baiap3	0.0064251
Slc25a19	0.0064358
Ttll3	0.0065255
Dusp5	0.006542
Agxt	0.0066483
Rtel1	0.0070723
Zc3h13	0.0070744
Krtap3-1	0.0070755
Slc2a1	0.0071075
Krtap1-3	0.0071235
Lcat	0.0071369
Rsph3b	0.0071865
Plcl1	0.0072138
Nipal4	0.0072319
Cldnd2	0.0072485
Bap1	0.0073681
Dalrd3	0.0074273
Zcchc13	0.0074781
Trpc4ap	0.0075523
Hcn2	0.0075753
Upf1	0.0075971
Qdpr	0.0076132
Lrrc38	0.0076324
Zbtb10	0.0077002
Mtmr1	0.0079074
Dennd2d	0.0079271
Suclg2	0.0079816
Slc8a3	0.0079971
Thbs1	0.0080831
Mib2	0.0081135
Mllt6	0.0081295
Kat5	0.0081963
Yipf2	0.008216
Khdc3	0.008278
Tas2r144	0.0082945
Pabpc1l	0.0084686
Commd8	0.0085829
Lyl1	0.0085925
Zfp398	0.0086891
Ccl24	0.0088365
Plbd1	0.0089214
Ccdc70	0.0089273
Cenpe	0.0090303
Tgif1	0.0091361
Mgat5	0.009159
Smarcal1	0.0092162
Cypt1	0.009245
Gbp10	0.0092701
Lrig3	0.0092904
Filip1	0.0094799
Nav1	0.0094901
Adcy4	0.0095173
Anks4b	0.0095552
Wdr1	0.0096081
Prr15	0.0096166
Pphln1	0.00963
Adra2a	0.0096583
Adam2	0.0096919
Esam	0.0097074
Chst14	0.0097603
Cnrip1	0.0098276
Mrgprf	0.0098703
Nnat	0.0098954
Myo10	0.010079
Taf12	0.010096
Ly6g6d	0.010167
BC030867	0.010271
Arl6ip4	0.010334
Gpr64	0.01037
Trrap	0.010444
Setd2	0.010594
Adra1a	0.010634
Gng8	0.010638
Postn	0.010759
Rslcan18	0.010847
Gm8994	0.010868
Slc22a1	0.01092
Diras2	0.010954
Rdh7	0.010955
Kdm1a	0.010971
Pcdh1	0.011012
Sstr3	0.011091
Brd7	0.011173
Wdr46	0.011184
N4bp3	0.011337
Rpl7	0.011352
Nop9	0.011384
Atp4a	0.011552
Cmip	0.011597
Mpv17l2	0.01162
Slk	0.011631
Tspyl1	0.011645
Otoa	0.011645
Syn3	0.011646
Prg3	0.011748
Morn4	0.011833
Ing5	0.011857
Srp9	0.011876
Kremen2	0.012
Rln3	0.012004
Fcamr	0.01202
Usp22	0.012022
Spo11	0.012064
1700066B19Rik	0.01213
Nlrx1	0.012191
Morc4	0.012201
Barhl1	0.012253
Nod1	0.012287
E330034G19Rik	0.012298
Rpusd1	0.012437
3830417A13Rik	0.012482
Oplah	0.012486
D19Bwg1357e	0.01252
Gm156	0.012581
Tshz2	0.012633
Igsf5	0.012715
Atf3	0.012732
Grid2ip	0.012925
Fam175b	0.012962
Tmem95	0.012983
Gtpbp1	0.013039
Zdhhc3	0.013041
Tex22	0.013052
Cdhr5	0.013165
Lect2	0.013183
Asic3	0.013187
Tubgcp6	0.013235
Bpifa3	0.013434
Gcm2	0.01347
Dock6	0.013491
H2-Eb2	0.013568
Lpin1	0.013584
Mycn	0.013609
AI314180	0.013617
Ubr1	0.013727
Helz	0.013735
Relb	0.013805
Zfp92	0.013825
Tnrc18	0.013869
Dnase2a	0.013948
Ceacam9	0.013996
Ndrg1	0.014003
Lcorl	0.014047
Gna12	0.01406
Vamp1	0.014094
Ipo9	0.014135
Arf4	0.014244
Dspp	0.014245
Mgarp	0.014314
Nadsyn1	0.014349
Siva1	0.01435
Ganab	0.014354
Otop3	0.01441
Cops8	0.014453
Nox1	0.014545
Polr2m	0.014656
Pla2r1	0.014691
Bag6	0.01476
Phgr1	0.014797
Kcnk13	0.014805
Spata13	0.014849
Cmtm6	0.014863
Spns2	0.014967
Dydc1	0.015077
A630007B06Rik	0.015079
Mbnl3	0.015088
Mgat5b	0.015114
Hdac5	0.01514
Itgb2	0.015213
Mbl2	0.01523
Trim24	0.015251
Fanci	0.015292
Ckmt1	0.015416
Lgals4	0.015498
Osr1	0.01551
Slco1b2	0.015584
Ext1	0.015693
BC030476	0.015724
Fam65b	0.01576
Rarres1	0.015778
Krtap4-2	0.016018
Rsph9	0.016026
3110047P20Rik	0.016164
Pga5	0.016223
Trim43a	0.016235
Gbp4	0.016277
Fbxl5	0.016319
Alox12b	0.016479
Nkx2-9	0.016504
Dhcr24	0.016511
Phc1	0.01656
Csmd3	0.01658
Ddx20	0.016632
Sned1	0.016635
A430005L14Rik	0.016648
Shc2	0.016764
Gpr171	0.016795
Xab2	0.016849
Magohb	0.016943
Larp1	0.016965
Zfp42	0.017084
Rhox3c	0.017132
Chpf	0.017154
Slc9a9	0.01716
Pcdhb13	0.017167
Klf9	0.017179
Vcpip1	0.017254
Reg3d	0.017298
Ms4a4c	0.017325
Trp53	0.017406
Klrb1	0.017493
0610009O20Rik	0.017516
Mcm3	0.017609
Psmd6	0.017659
Abcc4	0.017697
Aars2	0.017795
Dhrs7c	0.017924
Scgb1c1	0.017931
Hexim1	0.017963
BC037034	0.017967
Ms4a2	0.017997
Gm960	0.018012
Nrf1	0.018032
Tceb3	0.018063
Triml1	0.018091
Plin3	0.018127
Rfwd3	0.018155
Fgd4	0.018266
Kat8	0.018287
Mettl7b	0.018332
Mipol1	0.018364
Vmn1r44	0.018621
Slc2a10	0.018636
Speg	0.018636
Apex2	0.018675
Etv4	0.018859
Bcl2	0.018873
Asb16	0.018917
Epb4.2	0.01898
1700011I03Rik	0.019024
Gins3	0.019087
Cadps	0.01915
Glt6d1	0.019337
Igf2bp2	0.01942
1700061G19Rik	0.019505
2210404J11Rik	0.019541
Fam65a	0.019615
Xdh	0.019647
Mrap	0.019661
Whsc1	0.019676
Kat6b	0.019705
Dock11	0.019708
Atp6v1g2	0.019724
Sms	0.019987
Qtrt1	0.01999
Lnx2	0.020095
Asic2	0.020105
Uts2b	0.020213
Gm2a	0.020249
Mpc2	0.020321
Defb2	0.020349
Mcm8	0.020376
Ltb4r2	0.020398
Rtdr1	0.020409
Podn	0.020439
Myeov2	0.020453
Snai3	0.020454
Rxfp1	0.020481
Tnr	0.020495
Chga	0.020527
Ptk2b	0.020588
Sdhd	0.020611
Usp27x	0.020651
Hist1h2bj	0.020716
Bphl	0.020762
Zdhhc12	0.020866
Tmem246	0.020892
Dbx1	0.020899
Stfa3	0.020908
Egr2	0.021007
Mitd1	0.021027
Znrf2	0.021098
Sh3d21	0.021117
Ano7	0.021129
Mmp9	0.021139
Dlgap5	0.02114
Prepl	0.021267
1200011I18Rik	0.021275
Lce1f	0.021297
Mcmbp	0.021331
Bbs4	0.021365
Map1lc3b	0.021435
Proz	0.021595
Tmem179	0.021608
Gpr25	0.021649
Lrp5	0.021683
Tmem177	0.021854
Ptprt	0.022045
Cdk17	0.022086
Zfp598	0.022099
Pgs1	0.022228
Eln	0.022257
Nmt2	0.02226
Kcmf1	0.022419
Gpr15	0.022576
Aicda	0.022605
Nup214	0.022633
Wdr12	0.022701
Grik3	0.022713
Trmt112	0.022736
Krtap26-1	0.022767
8430427H17Rik	0.022768
Calr3	0.022851
Ankrd36	0.022884
Fiz1	0.022941
Ctxn3	0.02295
Srgap3	0.022992
Rrh	0.023186
Ambra1	0.023225
Lsmd1	0.023243
Scmh1	0.023253
Slc46a2	0.023254
Exoc7	0.023323
Psmb10	0.023522
Tusc1	0.023579
Bloc1s3	0.023615
AF067061	0.023732
Tuft1	0.023736
Ing3	0.023772
Gclc	0.023901
Cdsn	0.023955
Prkar1b	0.023973
Gpr119	0.024028
Ethe1	0.02405
2310042D19Rik	0.024053
Ddx6	0.024214
Cyp4a12a	0.02423
Pfkfb4	0.024236
Kcns1	0.024241
Zfp551	0.024269
Yod1	0.024335
Zfp507	0.024428
Adig	0.024442
Chrng	0.024508
Bai2	0.024523
Doc2g	0.024538
Arl9	0.024572
Eda2r	0.024633
Srd5a3	0.024714
Serpinb9d	0.024824
Cbwd1	0.025001
Klhl23	0.025075
Sdf4	0.025127
Defb19	0.025151
Lrrc48	0.025167
Pafah1b1	0.025241
Col24a1	0.025249
Ntf3	0.025348
Gpr88	0.025451
Gsdma	0.025483
Abcb11	0.02549
Fmo2	0.02555
Chtop	0.025554
Zfyve20	0.025565
Fanca	0.025641
Fkrp	0.025662
Syt3	0.02568
Ggact	0.02569
Mdh2	0.025693
Vmn1r180	0.026026
Stk16	0.026029
Zfp931	0.026044
Fam73b	0.026053
Upf3a	0.026058
Angel2	0.026136
Scap	0.026145
Npsr1	0.026163
Apc	0.026181
Alkbh1	0.026221
Hspg2	0.026338
Alpl	0.026389
Pard3b	0.026417
Coa4	0.026511
Fam207a	0.026579
Scaf11	0.026778
Bcam	0.026837
Ang5	0.026915
Srebf1	0.026948
Mall	0.026959
Prlh	0.026998
Spin2	0.027101
Nanos2	0.027146
Ston2	0.027179
Slc35a2	0.027201
Timd4	0.027269
Fbxo17	0.027327
Ttll7	0.027363
Mep1a	0.027385
Alyref	0.02744
Tbx1	0.027456
Slc25a48	0.027481
Slc7a7	0.02754
Pex11b	0.027606
Skint4	0.027729
Taar8b	0.027763
Pkp3	0.027777
Atl2	0.027786
Frmpd3	0.027866
Smcr8	0.027937
Pomc	0.027966
Tceal7	0.028031
Lrrc8b	0.028142
Dscc1	0.028165
Star	0.028252
Prl6a1	0.028258
Tcstv3	0.028341
Pptc7	0.028352
Gaa	0.028408
Cypt3	0.028419
Slc35g1	0.028501
Tal1	0.028506
Pla2g3	0.028588
Klk1b22	0.0286
1700067P10Rik	0.028618
Vmn2r54	0.028664
Synj2	0.028668
Smc6	0.028915
Creg2	0.028958
Rtfdc1	0.029076
Ythdc2	0.029127
Cyr61	0.029182
Lpp	0.029236
Zfp26	0.029399
Usp46	0.029503
Rps14	0.029561
Msh2	0.029561
Prickle1	0.029575
Pir	0.029706
Zfp784	0.029722
Azi1	0.029754
Man2a2	0.029821
Fgd1	0.029845
Pygl	0.029971
Tgfbrap1	0.030047
Sox17	0.030065
Samd1	0.030082
Ccdc125	0.030142
BC030307	0.030185
Cadps2	0.030264
Vmn1r27	0.030338
Cdc7	0.030387
Chchd6	0.030482
Lrwd1	0.030515
Ccdc142	0.030555
Mphosph8	0.030645
Fam89b	0.030696
Lap3	0.03075
Slbp	0.030838
Pik3r6	0.030848
Akap6	0.030898
Tnrc6a	0.030919
Sim1	0.03112
Uncx	0.03121
Ccdc113	0.031403
Pex26	0.031443
Numb	0.031517
Taf4a	0.031589
Nlrp5	0.031606
Amy1	0.031762
Tpsg1	0.031768
Rxfp2	0.031769
Sbno2	0.031917
Sgtb	0.031925
Asb14	0.031948
Plekhm1	0.031972
Gabrd	0.031974
Pde6b	0.032068
Clec2h	0.03216
Diexf	0.032197
Wdr45	0.032227
Hinfp	0.032229
Iqca	0.032306
Alas1	0.03233
Chml	0.03239
Abcd2	0.032392
Cdx2	0.032486
Phrf1	0.032525
Phf16	0.032705
E130309D02Rik	0.032715
Tnpo1	0.032822
Ier2	0.032873
Ces2f	0.032905
Traf6	0.032966
Npbwr1	0.032966
Megf10	0.033012
Arl16	0.033028
Itih1	0.033077
Ror1	0.033087
Micu3	0.033115
Ankrd66	0.033181
Tm4sf5	0.03323
Adamts9	0.033271
Myo1c	0.033411
Sephs2	0.033519
Prdx5	0.033563
Plat	0.033586
4833424O15Rik	0.033647
Sult4a1	0.033656
Siah1a	0.033661
Reep6	0.033744
Lactbl1	0.033779
Spata24	0.033828
Nmnat3	0.033838
Etv6	0.033843
Vps72	0.03388
Susd5	0.033895
Ssrp1	0.033898
Gmeb2	0.033955
Tmem161a	0.034035
C1qtnf2	0.034126
Maml2	0.034138
Mogs	0.03419
Ces1c	0.034202
Tmem164	0.034237
Cep78	0.034331
Rabac1	0.03436
Ppp1r3e	0.034365
Tmem47	0.03441
Smpd3	0.034429
Necab2	0.034444
L3hypdh	0.034502
Gm609	0.034532
Kcnk6	0.034687
Krtap4-7	0.034697
Pou3f3	0.034711
Khdc1b	0.034727
Xcr1	0.034843
Tktl2	0.034871
Atp8a2	0.034992
Trnp1	0.035073
Kirrel3	0.035149
Gimap5	0.035152
Gdf3	0.035153
Cd209g	0.035432
Ctc1	0.035437
Pex11g	0.035464
Kif26a	0.035466
Umodl1	0.035493
Ccdc115	0.035595
Ddx51	0.035643
Zmynd11	0.035685
Rasa3	0.035697
Clec2e	0.035732
Ndufv3	0.035752
Zfp329	0.035893
Dusp22	0.035952
Ndufa7	0.035961
Nrn1l	0.035964
Nelfa	0.035971
Mss51	0.03611
Barx2	0.03611
Arl14ep	0.036124
Panx1	0.036248
Pon1	0.036287
Pou3f2	0.036331
Fkbp4	0.036473
Ppp4c	0.036594
Arv1	0.036635
Heatr2	0.03665
Scn11a	0.0367
Il25	0.036771
Naa20	0.036787
Oxt	0.036878
Try4	0.036896
Ints1	0.036918
1810062G17Rik	0.036931
Chrna5	0.036983
Gzmf	0.037
Xkr7	0.037044
Gfi1	0.037116
Klrc2	0.037152
Btaf1	0.037231
Pla1a	0.037288
Acap2	0.037382
Nrg4	0.037449
Xlr3b	0.037519
Actg2	0.037543
Dcaf5	0.037552
Lonrf2	0.037566
Tubb1	0.037627
Abhd13	0.037681
Llgl2	0.037714
Helt	0.037749
Ubr5	0.037888
Ppfia1	0.037905
Amer3	0.037939
Tspyl5	0.037969
Zfp804a	0.038012
Cdkn2a	0.038095
Lalba	0.038157
Hoxb5	0.038277
Myrip	0.038292
Rnf150	0.03831
Nr2f1	0.038332
Foxd2	0.038465
Lmo1	0.038617
Sh2d5	0.038682
Adam21	0.038727
Susd1	0.038767
Gm17727	0.038781
Ncoa6	0.038799
Ccdc124	0.038849
Gucy2e	0.038955
Ccdc112	0.038958
Exog	0.039072
Defb8	0.039291
Pinx1	0.039378
Arhgef17	0.039379
Cd300lg	0.039393
Fgfr3	0.039396
Hand1	0.039403
Ush1g	0.039407
Dpysl2	0.039418
Vmn1r25	0.039545
Lce3d	0.039593
Bend6	0.039594
Pde4a	0.039703
Sik1	0.039755
Ap1m1	0.039808
Cyp7a1	0.039869
BC094916	0.039885
Cdhr2	0.039998
Rhoj	0.040015
Dera	0.040023
Dhx38	0.040129
Dleu7	0.040147
Atp5g1	0.040181
Tmem196	0.040195
Crot	0.040286
Arhgap27	0.04033
Tmem170b	0.040352
Higd2a	0.040397
Syce2	0.040485
Coprs	0.040493
Pbx4	0.040532
Agt	0.04062
Aox1	0.040624
G6pc2	0.040643
4930474N05Rik	0.040766
Ccm2l	0.040837
Kdelc1	0.040938
Gramd4	0.041017
Zbtbd6	0.041083
Gfap	0.041098
Bpgm	0.041138
Fam217a	0.041246
Ms4a4b	0.041391
Csf2	0.041438
Uts2r	0.041474
2510039O18Rik	0.04155
Btg4	0.041597
Ficd	0.041632
Cst9	0.041697
Mff	0.041868
Lin37	0.041949
Sema6b	0.041964
Zfyve1	0.041988
Adam4	0.042078
Plekhg6	0.042129
Pccb	0.042224
Arvcf	0.042287
Gas1	0.042347
Nemf	0.042373
Zfp423	0.042488
Tmem140	0.042501
Efcab11	0.042581
Slc17a2	0.042599
Uhrf1	0.04266
Dohh	0.042737
Mapk1ip1l	0.042741
Cox7a1	0.042774
Thbs4	0.042823
1700012B09Rik	0.042902
Elfn1	0.043048
Tmem81	0.043082
Ehbp1l1	0.043083
Nr0b1	0.043162
Ulbp1	0.04328
Dcbld1	0.043332
Myo16	0.043348
Usp54	0.043496
Zfp296	0.043514
Ghsr	0.043676
Ina	0.043681
Caskin2	0.043694
Fbxo2	0.04378
Eomes	0.043804
Cbln4	0.043819
Lyz2	0.043927
Ptpn18	0.043982
Eif2s3y	0.044032
Steap1	0.044139
Nomo1	0.044268
Spesp1	0.04429
Ttll8	0.044441
Amph	0.044463
Cyb561a3	0.044505
BC027072	0.044524
Adcy10	0.04453
Xpo7	0.044563
Foxd3	0.04469
Cdc42bpg	0.044704
Rapgef4	0.044759
Siglec1	0.044889
Tnfaip8l1	0.044949
Hnrnpd	0.045022
Zfp273	0.045105
Pbp2	0.04511
Prr5l	0.045128
Fbxw9	0.045214
Usp17lc	0.045263
Usp17ld	0.045263
7530416G11Rik	0.045315
Lipn	0.045347
Dnajc24	0.045359
Slc2a12	0.045429
Gm11570	0.045464
Lin9	0.045465
Sox10	0.04554
Snx20	0.045653
Kcnb2	0.045734
Hes6	0.045735
Ntn5	0.045741
Nf2	0.045779
Fam101a	0.045798
Sptssa	0.045807
Gsdmcl1	0.04594
Il23r	0.046089
Rgl1	0.0461
Gbp2b	0.046156
Cables1	0.046185
Copg1	0.04623
Tomm22	0.04624
Pold2	0.046241
Slc7a2	0.046277
Fam65c	0.046286
Kcnmb1	0.046396
Mstn	0.046412
Krt86	0.046431
A330021E22Rik	0.046489
Kctd13	0.046492
Fem1a	0.046534
Mnf1	0.046541
Rep15	0.046619
Ing2	0.046685
Hoxb2	0.046701
Sc5d	0.046718
Ear11	0.046773
Prkcg	0.046832
Zfp521	0.046926
Slc5a3	0.046947
Gtf3c2	0.046982
Ehhadh	0.046995
Ankrd12	0.047128
Cdk15	0.047143
Enpp5	0.047158
Cdc42se1	0.047172
2510003E04Rik	0.04724
Gm3238	0.047245
Plxnb3	0.047266
Dkk1	0.047329
Chst10	0.047409
Slc39a14	0.047558
Phkb	0.047624
Prrt3	0.047696
Osm	0.047833
Dab1	0.047855
Mtnr1b	0.047865
Lelp1	0.047876
Ube2e2	0.04802
Bub1b	0.048042
BC051628	0.048055
Clcn6	0.048104
Svs5	0.048268
Map3k6	0.048316
Skida1	0.048324
Mast3	0.048379
Zfp651	0.048492
Dnph1	0.048507
Gins4	0.04857
St6galnac6	0.048584
Ms4a10	0.048603
H2-K1	0.04876
Smr2	0.048914
Irf2bp1	0.048917
Ctdspl	0.048923
Krt4	0.048951
Prss44	0.048981
Slc22a12	0.048992
Ptx3	0.048994
Fam129b	0.049
Gpr50	0.049011
Pnkd	0.049019
AF529169	0.049045
Med18	0.049049
Ccdc62	0.049064
Rab13	0.049079
Zkscan2	0.049096
Htr4	0.049183
Krt82	0.049285
2310067B10Rik	0.049507
Cyp2d22	0.049534
Chsy3	0.049739
Ndfip2	0.049795
Fcrls	0.049817
Pacs1	0.049947
Nphp3	0.049989
Klrg1	0.050096
Ccl26	0.050114
Gnb4	0.050257
Ocstamp	0.050332
Pih1d2	0.050351
Adamts8	0.05055
Tfap2e	0.050653
Rlim	0.050655
Lipo1	0.050696
Cep76	0.050843
Slc10a2	0.050879
Gdnf	0.050888
Zfp746	0.050905
Scarf1	0.050959
A630023A22Rik	0.05099
Pax9	0.051053
Gtf2f2	0.051083
Trim47	0.051141
Mapk1	0.051159
Phlda1	0.051211
Gm11487	0.05122
Fmr1	0.051316
Klk1b5	0.051363
Oxr1	0.05137
Gm608	0.051468
Sort1	0.051502
Stbd1	0.051529
Gosr2	0.051633
Rin2	0.051652
Cdh13	0.051693
Nr0b2	0.051742
Snai1	0.051756
Ube2q2	0.051764
Csrnp2	0.051801
Frmd7	0.051822
Fgf13	0.05187
Olfm1	0.051942
Myf5	0.051946
Plekhg5	0.051999
Zfp953	0.052202
Asf1a	0.052202
Tas2r134	0.052269
Foxc2	0.052324
Gm648	0.052336
Hmox1	0.052553
Eml3	0.052572
Mum1l1	0.052623
Pik3c2a	0.052639
Rbm31y	0.05264
Zdhhc18	0.052671
Idh2	0.05269
Gm12597	0.052707
Rnh1	0.052751
Higd1a	0.052766
Isca1	0.052801
Sh3glb2	0.052808
1810046K07Rik	0.052862
Gsr	0.052864
Zbtb32	0.052893
Pdgfrl	0.052966
Lin54	0.052967
Tmem82	0.052986
Themis3	0.053111
Gm4906	0.053123
Cdan1	0.053229
Nmur2	0.053372
Nup160	0.0534
Pkmyt1	0.053538
Ccbl1	0.053545
Bms1	0.053601
Tmem121	0.053648
Uros	0.053663
Gsc	0.053677
Ctsl	0.053684
Ogdh	0.053709
Sohlh2	0.053766
Clk4	0.053921
Zc3h10	0.05396
Osbpl2	0.053987
Thy1	0.054008
Snx33	0.054023
Ndufc2	0.054133
Aen	0.05423
Vegfc	0.054268
Pdk2	0.054275
Wtap	0.054292
Foxp3	0.054338
Vmn1r83	0.054366
Rnf126	0.054402
Atp7b	0.054426
Neb	0.054436
Usb1	0.054456
Gabrb2	0.054459
Wdr20b	0.054535
Ret	0.054537
Zfp963	0.054603
Dytn	0.054679
BC024978	0.05469
Defb50	0.054715
Aff1	0.054742
Fbxl15	0.0548
Fdx1l	0.054873
Rora	0.054897
Jrkl	0.055025
Nxpe4	0.055037
Gm6484	0.055164
BC030500	0.055178
Gm14496	0.055188
Ldlrap1	0.055405
Upk3bl	0.055445
Ppp1r7	0.055492
Tyw1	0.055495
Rhobtb1	0.055612
Rasgrp3	0.055629
Phyhip	0.055633
Pgr15l	0.055814
Slc47a2	0.05584
Sephs1	0.055943
Eya4	0.05596
Dsel	0.056076
Klf15	0.05608
Cilp	0.056199
Cpa5	0.056263
Gpr62	0.056322
Tmem169	0.056376
Anxa7	0.056402
Tmem143	0.056445
Glt28d2	0.056546
Rce1	0.056556
Ptdss2	0.056703
Crhr1	0.056707
Ehd2	0.056769
Ccdc27	0.056823
Slc5a4a	0.056834
Fam46b	0.056839
Slc35f5	0.056842
Adnp2	0.056847
Mgp	0.056926
Rhox2h	0.05693
Tex33	0.056941
Cxcl14	0.056953
Foxm1	0.056998
Ddo	0.057002
Dcaf10	0.057015
Pole4	0.057023
Ube2d1	0.057196
Fstl5	0.057276
Vmn2r115	0.057392
Cdc16	0.057453
Slc11a1	0.057579
Pvalb	0.057609
Marveld1	0.057655
Xlr3c	0.057674
Ppfibp2	0.057681
Tbpl2	0.057747
Rapgef5	0.057773
Pop4	0.057891
F2rl3	0.057911
Asxl1	0.057963
Dmrtc1b	0.058055
Ms4a13	0.058309
2310061I04Rik	0.058318
Spcs2	0.058354
Vmn1r76	0.058354
Aspm	0.058471
Lpar4	0.058483
Cnot1	0.058496
Cdh24	0.058497
Zfp84	0.058551
Tssk6	0.058647
Cgref1	0.058647
9430038I01Rik	0.058745
Cnot3	0.058799
Spag8	0.058942
Adcy7	0.058943
Oas1e	0.059072
Zdhhc7	0.059126
Crxos1	0.059157
Lrrc9	0.059157
Nt5e	0.059201
Kcnc1	0.059219
Lrrtm1	0.059288
4921506M07Rik	0.059319
Cpne1	0.059322
Rassf3	0.059337
Gm13283	0.059475
Mettl2	0.059483
Brd8	0.059514
Icam5	0.059521
Ifi47	0.059824
Map4k1	0.059832
Prmt10	0.059879
Hspa5	0.059949
Stk32a	0.059974
B3gat2	0.060014
Ppp1r3f	0.060047
Arrdc5	0.060048
Atg9a	0.060188
Arhgap26	0.060206
Wdr25	0.060223
Slc36a3	0.060228
Rabif	0.060342
Klk1b24	0.060343
Ptger1	0.060375
Katnal1	0.060397
Fam136a	0.060498
Lgr5	0.060525
Wwc2	0.060531
Nrtn	0.060593
Clec2l	0.060643
Ppcdc	0.06071
Golim4	0.060764
Lsm14b	0.060785
Slx4	0.060787
Papd5	0.060893
Zfp280c	0.060893
Rasal2	0.060919
Esr2	0.060949
Fam89a	0.060963
Camkv	0.061073
Emc8	0.061095
Brsk1	0.061164
Ffar1	0.06117
Ripply2	0.061211
Nmb	0.061275
Tpm4	0.061325
Sema3b	0.061376
Insl3	0.061432
Spry4	0.061458
Ppil1	0.061462
Stx11	0.061501
Atp1a1	0.061544
Fcrla	0.061554
Clns1a	0.061575
Tcte3	0.061591
Eef2	0.061632
Dnmt3b	0.061711
Atp5s	0.061788
Gkn2	0.061873
Gatm	0.061888
Junb	0.061941
Aldh1a3	0.061955
Ctsr	0.061975
Ccdc39	0.061998
Tmc6	0.062085
Pnliprp2	0.062192
Sdhc	0.062355
2010107G12Rik	0.062464
Sord	0.0625
Poldip3	0.062516
BC048609	0.062521
Dbh	0.062546
Gabra5	0.062643
Itpr3	0.062658
Osbp2	0.062731
Alpk2	0.062756
Gm13769	0.062786
Gpr180	0.062836
Nkx2-1	0.06285
Txnrd1	0.062884
Ssc5d	0.062924
Kdm6b	0.063192
Chmp7	0.063235
Zfp354b	0.063266
Mmp19	0.063338
2310003H01Rik	0.06341
Rtkn	0.063474
Plekho2	0.063484
Cul5	0.063559
Sept11	0.063687
Otud4	0.063706
Dnttip1	0.063782
Elp5	0.0638
Pkp4	0.063871
Casp14	0.063904
Rspo1	0.063918
Lingo2	0.063952
BC100451	0.064024
S100a7a	0.064036
Ftl1	0.064047
Nfu1	0.06413
Gm19345	0.064226
Icam2	0.064264
Rhbdl1	0.06427
Fhit	0.06429
Akr1c20	0.064308
D730039F16Rik	0.064406
Mcpt1	0.06444
Tdrd5	0.064447
Gpr158	0.064523
Slc6a7	0.064539
Stk38l	0.064579
Slc44a4	0.06467
Il12a	0.064889
Bod1	0.064901
D3Bwg0562e	0.064998
H2-T3	0.06503
Cbx3	0.065175
Egln1	0.065192
Wisp2	0.065208
Rab6b	0.065313
Prss36	0.065334
Gata6	0.065343
Kirrel2	0.065388
P2ry1	0.065488
Abca15	0.065636
Prrg2	0.065699
Qprt	0.065771
Rpap2	0.065781
Psmg2	0.065918
Mrpl38	0.065926
Cldn14	0.06593
Celsr2	0.066206
Ado	0.066299
Mark4	0.066343
Syt14	0.066358
Procr	0.066407
Mef2b	0.066418
Gfra2	0.066477
Slc45a3	0.066491
Pa2g4	0.066626
Il7r	0.066654
Zxdc	0.066757
Zmiz1	0.066896
Fzd5	0.066933
Il27ra	0.066933
Bcl2l13	0.067019
Prokr2	0.067022
Trim29	0.067052
Erbb3	0.067169
Apold1	0.067221
Snx22	0.067223
Tmed1	0.0673
Aurkaip1	0.067323
Trim14	0.06737
Gpx3	0.06742
Chchd10	0.06743
Ccdc167	0.067472
Tmem150c	0.067504
Mlph	0.067619
Ltb	0.067691
Lrrc42	0.067766
Tjp3	0.067785
Vmn1r23	0.067911
Fnip1	0.06792
Cpn1	0.06798
Snhg11	0.068022
Tango6	0.068066
Bhlha15	0.068163
2700081O15Rik	0.068209
Capg	0.068258
Art3	0.068292
Mpg	0.068426
Lurap1	0.068443
D430041D05Rik	0.068484
Gnpnat1	0.068493
G3bp1	0.06852
Dnah10	0.068569
Fam129c	0.06867
Fam186b	0.068672
Pbx1	0.068749
Zbtb8b	0.068803
Fam184a	0.068959
Plxdc2	0.068969
Slc25a26	0.069177
Fzd6	0.069223
Fto	0.069228
Tsc22d1	0.069235
Inca1	0.069252
Fam60a	0.069357
Hrk	0.069521
Klra5	0.06953
Pcdh20	0.069547
Rccd1	0.069566
Amdhd2	0.069614
Cdk18	0.069685
Spata3	0.069729
Cdh23	0.069795
Slc6a4	0.069901
Cnot4	0.069914
Trim67	0.069983
Hk2	0.070042
Acta1	0.070043
Champ1	0.070195
Wbp4	0.070204
Apol10a	0.070216
Ociad1	0.07031
Gnb2	0.070352
Htr7	0.070378
Mlxipl	0.070411
Vcam1	0.070439
Prkcz	0.070494
Tmem192	0.07057
Nbeal2	0.070617
Metrn	0.070628
Epg5	0.070645
Zfyve26	0.070775
Amd1	0.070786
Myo1e	0.070798
Zkscan5	0.070893
4922501C03Rik	0.070898
Socs6	0.0709
Gm5901	0.070952
Fbxl18	0.070984
Syvn1	0.071051
Znfx1	0.071107
Plac8	0.071125
Rbmxl2	0.071203
Mtl5	0.071345
Foxo6	0.071358
Tinag	0.07139
Sos2	0.071397
Pkd1l3	0.071412
Eif3j1	0.071478
Trh	0.07157
4930526D03Rik	0.071571
Sparc	0.071612
Ppm1m	0.071626
Vmn2r27	0.071773
Cox8c	0.071811
Iah1	0.071943
Itga5	0.071955
Pcif1	0.071975
Cdkn2d	0.072052
Neurod1	0.072077
Mis18a	0.072103
Sirt2	0.072195
Nt5c1b	0.072205
Alox12e	0.072235
Lonrf3	0.072239
Hist2h2bb	0.07235
Tmem222	0.072433
Npc1l1	0.072445
Tmed4	0.072509
Dnase1l3	0.072523
Tfdp1	0.072585
Dcaf4	0.072672
Phc2	0.072696
Ush1c	0.072803
Fam178b	0.072953
Zglp1	0.072987
Tm9sf1	0.072995
Mb21d2	0.073082
Ccdc102a	0.073085
Dbi	0.073097
Nr1i3	0.073243
Dak	0.073245
Glipr2	0.073264
Kif5a	0.073293
Ttc39c	0.07337
Fibcd1	0.07341
Lrig1	0.073423
Zfp426	0.073452
D8Ertd82e	0.073507
Swsap1	0.073533
Mmp28	0.073585
Mr1	0.073651
Itga4	0.073686
Bin1	0.073773
Tap1	0.073788
Bccip	0.073801
Jmjd7	0.073813
Zfp568	0.073847
Pwp1	0.073942
Cdh1	0.074029
Rnaseh2a	0.074075
C8a	0.074077
Pkp1	0.074109
Klrb1c	0.074133
Gda	0.074144
Sfxn5	0.074213
Uba2	0.07426
Edaradd	0.07436
Lrp11	0.074442
Sec24b	0.0745
Serpinb6d	0.074517
Islr	0.074546
Pitpnc1	0.07462
Arhgap36	0.074627
Vmn1r1	0.074654
Rprm	0.074677
Peli1	0.07469
Pla2g15	0.074707
Fam118a	0.074761
Pfn2	0.074789
Abr	0.074796
Fundc1	0.074837
Cryab	0.074913
Esrp2	0.074917
Herpud1	0.074936
Ang2	0.074962
Krt6a	0.074983
Ccdc81	0.075069
Aldh16a1	0.075083
Vmn1r28	0.075098
Igf1	0.075126
Klk15	0.075159
Slc29a1	0.075172
Grtp1	0.075211
A2m	0.075288
Spsb3	0.075356
Itgb3	0.075373
Kcna3	0.075389
Med30	0.075513
Trank1	0.075524
Maged1	0.075659
Prss40	0.075788
Hc	0.075824
Dsg4	0.075879
Actl9	0.07593
Aco1	0.076022
Tmprss15	0.076032
Fa2h	0.076044
Tcta	0.076055
Fam20b	0.076084
Grik4	0.07617
Adam32	0.076181
Tmco3	0.0762
Mgll	0.076216
Adprhl2	0.07627
Pdzd7	0.076323
Gm9	0.07648
Tle3	0.076528
Lix1	0.076602
Rasal3	0.076626
Hes2	0.076726
Bend4	0.076734
4931429L15Rik	0.076752
Myoc	0.076755
Gm4788	0.076873
Smyd2	0.076898
Il17a	0.077012
Rab7l1	0.077089
Gadd45gip1	0.0771
Ifltd1	0.077155
Frem2	0.077175
Cgn	0.077255
Hadha	0.077281
Nxpe3	0.077292
Prpmp5	0.077341
Mta1	0.07742
Klk1b11	0.077422
Fam160b1	0.077433
Lmod3	0.077471
Vwa5a	0.077541
Ddx60	0.077565
Zfp513	0.077631
Svs2	0.077705
Cirh1a	0.077709
Lpl	0.077851
Slc25a10	0.077867
Sars	0.078012
Mkrn3	0.078114
Acaa1b	0.078142
Lhfpl1	0.078311
Acsf2	0.078413
Srsf12	0.078424
1700110M21Rik	0.078505
Rpn2	0.078544
Myh11	0.078559
Nim1	0.078562
Lrr1	0.078578
Synpr	0.078583
Rmi2	0.078595
Rnf149	0.078633
Sox8	0.078654
Trp53bp1	0.078704
Fermt1	0.078737
Cdk5r1	0.078773
Ctcfl	0.078834
Sema5b	0.078879
Dlc1	0.078918
Amacr	0.078977
Ddx58	0.079006
Dlx2	0.079034
Dab2	0.079116
Cdh16	0.079162
Lrrc4	0.079206
Gemin8	0.07925
Atp8b1	0.079297
Snx21	0.079374
Niacr1	0.079384
Ces1d	0.079424
Gm11565	0.079485
L1cam	0.079505
Loxl1	0.07951
Engase	0.079585
Ccdc36	0.079725
Bdkrb2	0.079725
Sh3bgr	0.079799
Tmem120a	0.079835
Emp2	0.079856
Trmt1	0.079874
Gabra1	0.079886
Cpxm1	0.079935
Gucy1b2	0.080078
Vnn1	0.080081
Dnah1	0.080197
Wipi1	0.080204
Igf2	0.080316
Usp2	0.080358
Zbtb3	0.080362
Rnf169	0.080482
A830010M20Rik	0.080499
Ift74	0.080582
Fech	0.080631
Nipal2	0.080633
Brf2	0.080649
Atrnl1	0.080694
Prickle3	0.080871
Areg	0.08093
Ndrg4	0.080962
Prrg3	0.081021
Trim6	0.081039
Dmrta1	0.08109
Lrrc16b	0.08109
Galnt7	0.081109
Nfatc1	0.081194
Creld1	0.081203
Megf6	0.081235
Arhgef6	0.081367
Gm996	0.08144
Ankrd28	0.081458
Efnb2	0.081504
Zfp771	0.081543
Ampd3	0.081546
Ntrk3	0.081647
Src	0.081695
AI182371	0.081714
1700011H14Rik	0.081767
Bcl2l11	0.081776
Mroh5	0.081797
Cmah	0.081817
Pln	0.081824
Higd1b	0.081845
Lrfn3	0.081936
Fam213b	0.082012
Mst1	0.082016
Zdhhc14	0.082027
Poll	0.082027
Bcorl1	0.082158
Rps19bp1	0.082185
Me3	0.082205
Emp1	0.082259
Ddit3	0.082263
Frs3	0.082371
Ubtfl1	0.082376
Acot2	0.082383
Rcn1	0.082417
H2-M2	0.082508
Vmn1r22	0.082527
Hspa12b	0.082634
Sigirr	0.08267
Rab11fip1	0.082699
Spib	0.082786
Triml2	0.082811
Pdcd6ip	0.082817
Rgs18	0.08285
4930404N11Rik	0.082909
Fpr-rs4	0.082933
Hcst	0.082944
Tns4	0.082987
Lrp10	0.083097
Akap3	0.083153
Ap5m1	0.083172
Ambn	0.083194
Fam212b	0.08323
Lmo7	0.083232
Ccdc130	0.083317
Abcc12	0.083337
Rbm12	0.08341
Mxra8	0.08342
Dusp28	0.083438
Endov	0.083547
Kcnh7	0.083664
Pgm5	0.083678
Ptprn	0.083861
Colgalt2	0.083924
Ngfrap1	0.083931
2410127L17Rik	0.084012
Kcnh5	0.084079
A1bg	0.084197
Plxnd1	0.084279
Strip1	0.084354
Nr2f6	0.084363
Rnf121	0.084521
Gimap3	0.084532
Hoxb9	0.08462
Il11	0.084626
Sgce	0.084738
Bzw2	0.08475
Mki67	0.08488
Pax2	0.084919
Prok1	0.08495
4933406M09Rik	0.085124
Tex13	0.085128
Colec12	0.085132
Lrrfip2	0.08519
Kat6a	0.085291
Catsperd	0.085427
Matn3	0.085471
Snta1	0.085489
Grip2	0.085501
Clip3	0.085525
Hsd17b2	0.085611
Bach2	0.085612
Dlx4	0.085691
Brpf1	0.085705
Tmem205	0.085834
Rnf13	0.085844
Kansl3	0.085875
Cyp2u1	0.085895
Rtn4r	0.085949
Spata31d1a	0.086024
Prl7a2	0.086025
Copb1	0.086032
Txndc16	0.08608
Gsk3a	0.086225
Gm5741	0.08624
Apeh	0.086248
Tsc22d4	0.08635
Tspan18	0.086397
Nol10	0.08643
Cox8a	0.086472
Dusp1	0.086539
R3hdml	0.086541
Alkbh4	0.08655
Irs2	0.086581
Asap3	0.086596
Lsm10	0.086626
Nos3	0.086705
Krt222	0.086719
Prss37	0.086784
Ranbp17	0.086862
Kmt2b	0.086986
Gm13084	0.086996
Tnrc6c	0.087083
Chrna6	0.087089
Abl1	0.087117
Gpm6b	0.087123
Mboat2	0.087211
Tm2d2	0.087224
Slc37a2	0.087242
Gpatch1	0.087256
Pth1r	0.087276
Slc26a2	0.087412
Fras1	0.087612
Tssk5	0.087675
Ces1e	0.087698
Lin52	0.087723
Fdxr	0.087747
Zfp652	0.087749
Tmem163	0.087804
Actrt1	0.087805
Dennd3	0.08794
Mospd3	0.087942
Per2	0.087966
Krt20	0.088091
Fam170b	0.088226
Rgs5	0.088248
Dkk4	0.08837
Cltb	0.088481
Ncstn	0.088482
Mmp16	0.088544
Fam187a	0.088594
Cspg5	0.08861
Slc34a1	0.088671
Pnmal2	0.088709
Eif4enif1	0.088752
Ccndbp1	0.088849
Atp13a1	0.088849
Fpr1	0.088885
Celf4	0.0889
Ttyh1	0.088954
Efna3	0.089003
Hyal1	0.08903
Rbp1	0.089165
Rpl3l	0.089208
2900026A02Rik	0.089276
Fmnl2	0.089312
Pcdh7	0.089334
Ralgapb	0.089366
Xbp1	0.089401
Cend1	0.089489
Ankrd52	0.089671
Gemin2	0.089696
Fam213a	0.08971
Krt80	0.089753
Zfp941	0.089854
Ulk4	0.089896
Gm16532	0.089913
Trim43b	0.089934
Nin	0.089944
Ndc1	0.09002
1700003E16Rik	0.09007
Pold1	0.090108
Mlf1ip	0.090187
Krt7	0.09033
1700019N19Rik	0.090353
Rorb	0.090384
Gata5	0.090385
Kprp	0.090447
Tnfrsf11b	0.090482
B4galnt1	0.090522
Rom1	0.090568
Padi1	0.090579
Gata2	0.090625
Itgal	0.090658
Gm11563	0.090682
Endod1	0.090796
Ascl1	0.090807
B930041F14Rik	0.090878
Rplp0	0.091061
Abi2	0.091083
Rgcc	0.091089
Xkr8	0.091123
Epc1	0.091213
Mapk15	0.091225
Cep57	0.091276
Ppid	0.091359
Rnf183	0.0914
Lrrc49	0.091428
Adamts17	0.091428
Galnt12	0.09151
Ly96	0.091573
Tvp23b	0.091584
Haus2	0.091628
Ttc37	0.091699
Hsp90ab1	0.09172
Ptma	0.091759
Tfrc	0.091783
Ticam2	0.091835
Cd248	0.091858
Casp8ap2	0.091876
Bcas3	0.091909
Ctso	0.091918
3425401B19Rik	0.091985
Ept1	0.092001
Mier2	0.092033
Rgs7	0.09204
Arfrp1	0.092091
Cep250	0.092168
Rho	0.09222
Wipf3	0.092254
Ppp1r26	0.092258
Lace1	0.092282
Ripk2	0.092321
Zfp457	0.092325
Ccdc24	0.092402
Acrv1	0.092432
Sdf2l1	0.092459
Htra4	0.092466
Ms4a4d	0.092689
Slit1	0.092752
Cntn2	0.092795
Nek11	0.092827
BC048507	0.092837
Tuba1b	0.092936
Fshb	0.092976
Zfp235	0.093027
AI467606	0.093033
Tmem191c	0.093111
Ptprb	0.093137
Ncaph	0.093253
Trpa1	0.093324
Ms4a3	0.093333
Zfp1	0.093373
Rgp1	0.093408
Agr2	0.093451
Six2	0.093482
Cd207	0.093501
Pex1	0.093514
Slc4a8	0.093521
Spg7	0.093537
Ogdhl	0.093563
Prr16	0.093613
Taf4b	0.093643
Faim	0.093665
C1qtnf3	0.093667
Zswim8	0.093739
Dusp4	0.093769
St6galnac2	0.09379
Numbl	0.093814
Atp5g3	0.09384
Pttg1ip	0.093915
Zc3h3	0.093984
Aasdh	0.094267
Zkscan17	0.094296
Tppp	0.094327
Cldn6	0.094335
Rasal1	0.094341
Sdhaf2	0.094396
Plscr3	0.094417
Il18	0.094598
Rab26	0.094625
Grm7	0.094706
Loxl4	0.094802
Hyou1	0.094877
Prickle2	0.094933
C2cd4c	0.094969
Sstr2	0.095023
Gbx2	0.095062
Kcnq5	0.095137
Trappc9	0.095142
Slfn5	0.095186
Nov	0.095261
Pyroxd2	0.095276
Six5	0.095315
Bckdhb	0.095327
Elp6	0.095343
Bahd1	0.095395
Tmem115	0.095411
C2cd4b	0.09552
Myo5c	0.095547
Vac14	0.095586
Wnt6	0.095592
Tpmt	0.095602
Gjc2	0.095626
Eral1	0.095666
Kif6	0.095728
Bicd1	0.095736
Srxn1	0.095862
Bri3	0.095922
Obox2	0.096052
Klk1b16	0.096065
Slc25a41	0.096077
Arhgap32	0.096214
Gprc5c	0.09622
Ltc4s	0.09626
Ap1m2	0.096277
Lgi2	0.096335
Nab1	0.096357
Kcnh2	0.096483
Papolb	0.096541
Tgfbi	0.096558
Slc4a3	0.096599
Tmem17	0.096621
Spryd7	0.096625
Chic1	0.096641
Proser1	0.096716
Ikbkb	0.096757
Rhbdd2	0.096856
Pwwp2a	0.096871
Agrp	0.096918
Ace3	0.096935
Wash	0.097015
Lancl1	0.097021
Ccz1	0.097041
Ncln	0.097048
Spata33	0.09705
Lamp3	0.097058
Sptb	0.097071
Arsk	0.097187
Col22a1	0.097213
Xlr3a	0.097241
Tex26	0.09732
Mtmr7	0.097477
Col4a2	0.097505
C2cd4a	0.097549
Nhlrc2	0.097561
Apopt1	0.097642
1700030K09Rik	0.097714
Klhdc7a	0.09772
Scx	0.097749
Dna2	0.097757
Ap5z1	0.097794
Mettl4	0.097815
Urod	0.09785
Calcrl	0.097924
Dnajc28	0.098058
Prkcq	0.098061
Slc25a54	0.098067
Gucy1a3	0.098127
Mrpl43	0.098148
Ccdc19	0.098156
Pelo	0.098187
Pgbd1	0.098259
Nlrp4a	0.098264
Car15	0.098293
Rab5c	0.098353
Cldn22	0.098408
Nrcam	0.098411
Snx1	0.098484
Ints10	0.098506
Zdhhc11	0.098516
Ppp6c	0.098544
S1pr5	0.098556
Adamts5	0.09875
Muc5ac	0.098767
Hmx3	0.0988
Best2	0.098817
Lmtk3	0.098827
Mcm4	0.098966
Nipal3	0.099043
Chek2	0.099233
App	0.099313
2210010C04Rik	0.099329
Alg1	0.099368
Fam171a2	0.099396
Ostn	0.099452
4921524L21Rik	0.099507
Tmem184a	0.099562
2310045N01Rik	0.099617
Mettl23	0.099625
Prss30	0.099636
Sox18	0.099675
Erap1	0.099745
1700066M21Rik	0.099771
Hibch	0.099775
1700007G11Rik	0.099784
Twf2	0.099792
Blnk	0.09982
Orc6	0.099889
Ctbp1	0.09996
Ccl2	0.10002
Gm7325	0.1001
Lyzl4	0.10017
Gm136	0.10029
Rbpms2	0.10039
Scn4a	0.10042
Rpl8	0.10044
Abca8b	0.10052
[truncated: 16,544 more rows]
