# Supplementary material for: A CRISPR knockout screen identifies SETDB1-target retroelement silencing factors in embryonic stem cells
Source: HighWire-hosted journal article supplement (doi:10.1101/gr.227280.117), 2018-05-04
Supplement: Supplemental_Table_S2.xlsx [file Supplemental_Table_S2.xlsx]

## Sheet: Sheet1
Supplemental Table S2: Differentially expressed genes and repeats in the Morc2a KO mESC, Related to Figure 4
Gene			Repeat
Upregulated	Downregulated		Upregulated	Downregulated
Epha5	Mrps12		FordPrefect:hAT-Tip100:DNA	IAPEY4_I-int:ERVK:LTR
Fat3	Pmvk		L1Md_A:L1:LINE
Casp14	Sdc1		L1Md_Gf:L1:LINE
Xlr5c	Obsl1		L1Md_T:L1:LINE
Gabra3	Kif26a		MamGyp-int:Gypsy:LTR
Pramel7	Idi1		ORR1E-int:ERVL-MaLR:LTR
Pard3b	Pla2g10		RLTR1B:ERV1:LTR
Neurog3	Dusp6		RLTR25B:ERVK:LTR
Xlr3c	Olfm1		RMER6C:ERVK:LTR
Creb5	Mien1
Nxf3	Elmo1
P2rx3	Alkbh2
Dnah5	Gyk
Nxf2	Acat2
Svop	Itga3
Taf7l	Fut9
Gabrg3	Tmem45a
Xlr3b	Plcb3
Parvg	Aprt
Ctnnd2	Sfn
Xlr5b	Cabp1
Cadps2	Nsdhl
Gm10697	Map9
Tdpoz5	Bnc2
Tspan8	Notum
Hivep3	Gm15055
Neb	Anpep
Glrp1	Pex10
Aff2	Fam111a
Heph	Tmeff1
Pkhd1	Gcat
Tex101	Slc39a10
Gtsf1	Llgl2
Gria3	Galt
Cdc14a	Nxn
Gm364	Slc29a1
Sycp2	Ccne1
Cntnap3	Zic5
Tmprss11f	S1pr2
Xlr4a	Lrp8
Grb10	Slx1b
Fgl1	Ldha
Xlr5a	Slc29a2
4930524B15Rik	Cbs
Sycp1	Tmem63a
Xlr4c	Idh1
Muc1	Pecr
Gm21283	Pdia6
Ano3	Eno1
1700123I01Rik	Ndrg2
Trim66	Eno1b
Mt2	Lphn2
Topaz1	Mgarp
Ddr2	Slc16a3
Gm6880	Enox1
Gm5091	Tdh
Aldh1l2	Scd2
Ikzf3	Cntfr
Gm1141	Ppapdc1b
Pdha2	Gbx2
Rpl10l	Csrnp3
Tdrd9	Tpi1
Abca8b	Cntnap2
Col6a4	Spry4
Alox5	Epha4
Lamb3	Stard4
Tarm1	Pigyl
F8	Tubg1
Calml4	Bcat2
Fbln5	E2f2
Myom1	Pipox
Sh3gl3	4632415L05Rik
Zcwpw1	A2m
Asz1	Casp8
AV320801	Rgs20
Mia	Ppm1j
Cdk14	Gatsl3
Gc	Tm7sf2
Kcnt2	Nnat
Pnma5	3632451O06Rik
Gm5662	Cers4
Uba1y	Bcl2l14
Xlr4b	Lss
1700029P11Rik	Pycr2
Prkce	Epha1
4930591A17Rik	5430416N02Rik
Gm21319	Arrdc2
Slfn4	Mpi
Snap91	Atg9b
Xlr3a	Rbm14
Serpine2	Gadd45b
Slc18a1	Isyna1
Smarca2	Ppap2c
Dyrk4	E2f8
Dock10	Cyp51
Fam120c	Kifc3
B4galnt2	Apela
Uty	Lpar6
Zfy1	Lgals9
Tenm4	Lefty1
Tek	Epha7
2810442I21Rik	Ept1
Gm2016	Mrm1
Aldh1a2	Pdzd4
Hhip	Mvk
Ddx3y	Nt5c
Ttc28	Tmem158
Kdm5d	Dcaf12l1
Ecel1	Msc
Otud6a	A830018L16Rik
Fggy	Fads2
Pros1	Dnmt3a
Tktl2	Dusp9
App	Mospd3
D1Pas1	Timm21
Dazl	Sulf1
Mov10l1	Itpk1
Tnik	BC055111
Fkbp6	Fam195a
Slfn3	Cotl1
Mal2	Pdk1
Slc25a31	Insig1
Eif2s3y	Bhlhe40
Hpca	Mep1b
Sult6b1	Icosl
Hormad1	Stambpl1
Gm2022	Aldoc
Trim52	Pdk4
9030617O03Rik	Pitx2
Nell2	Notch4
Sobp	Igsf21
Ophn1	Mvd
Efcab2	Tfrc
4933416C03Rik	Fah
Ddit4l	Gas7
Mt1	Egln3
Celf2	Cacng7
Arsb	Acy1
Fetub	Adam19
Tex11	1190005I06Rik
Nbea	Trh
Stk31	Gm7120
Esrp1	Fdps
Fam214a	Slc7a7
Ephx2	Ramp3
Gm13034	Utf1
P2rx7	Otx2
Plxdc2	Dhcr7
Msrb3	Nek3
Olfr613	Rapgef3
Lonrf3	Islr2
Smc1b	Robo4
Sec1	Elavl3
Zfp750	Peg10
G0s2	Car2
Efhc2	Snhg5
Cyct	Kirrel2
Prkca	Ccdc3
Cd80	Cd6
Trim12c	Dok2
1700019A02Rik	Etv4
Grip1	Creld1
Tmem132c	Lefty2
Ano10	Aass
Papolb	Scd1
Pcbd2	H60b
Gm8300	Scn3a
Gbp9	Cphx1
Cbx4	Cphx2
St6galnac3	Fgf17
Ptpn14	Lipg
Gm17644	Myc
Zfp488	Cybb
Clca4	Pdyn
Rnf157	Etv1
Gm15698	Ildr1
AI414108	Ntn1
Hck	Slc6a1
Atf5	Gm10825
Reg2	Pirt
Dmrtc1c1	2310069B03Rik
Dmrtc1c2	Ido2
Cap2	H19
Gpr124	Morc2a
Moxd1	Pcsk9
Focad
Zscan4e
Adc
Galnt11
Scrn1
Plk2
Kif1a
E330020D12Rik
Pilra
AI662270
Nxpe3
Bcl6
Aig1
Inadl
Dynll2
AU022751
Il2rg
Usp26
Klk10
Ptk2b
Syce1
Lhpp
Rgs9
Plcb4
Ahnak
4933427D06Rik
Mfsd6
Klf12
Fbxw4
Cth
Vdr
Trp53inp1
Npnt
Dixdc1
Kcnq1ot1
Spag16
Mael
Lrrc48
Piwil2
Nefl
Spp1
Camk2d
Prph
Reep6
Crabp2
Klhl26
Ap1m2
Nanog
Sdc4
Col9a2
Ap1s3
Sycp3
Fbxo10
Tdrd12
Parva
Tex15
Enox2
Adap1
Sord
Cdkn1a
Pla1a
Tulp4
Mapk8ip2
Smarca5-ps
Aga
Ret
Pramel1
Cul9
Prkcb
Fgf4
Cntln
Abca1
Col9a3
Fbxo15
Ddx19b
Aoah
Rhox13
Cryzl1
Fam13c
Ly6k
Phf10
Gkap1
Calca
Grhl2
Ddx4
Dnah10
