# Supplementary material for: A CRISPR knockout screen identifies SETDB1-target retroelement silencing factors in embryonic stem cells
Source: HighWire-hosted journal article supplement (doi:10.1101/gr.227280.117), 2018-05-04
Supplement: Supplemental_Table_S3_.xlsx [file Supplemental_Table_S3_.xlsx]

## Sheet: Sheet1
Supplementary Table 3: Differentially expressed genes and repeats in Resf1 KO mESC (Columns colored by yellow indicate imprinting genes), Related to Figure 6
Gene			Repeat
Upregulated	Downregulated		Upregulated	Downregulated
1700007K13Rik	1110007C09Rik		BGLII:ERVK:LTR	MTE2b-int:ERVL-MaLR:LTR
1700047E10Rik	1190002F15Rik		Charlie2b:hAT-Charlie:DNA	RLTR41:ERV1:LTR
1700091H14Rik	1500012F01Rik		Charlie8:hAT-Charlie:DNA	RMER17C2:ERVK:LTR
1810022K09Rik	1700013H16Rik		ETnERV-int:ERVK:LTR
2010204K13Rik	1700020L24Rik		ETnERV2-int:ERVK:LTR
2210039B01Rik	2010300C02Rik		IAPA_MM-int:ERVK:LTR
2410088K16Rik	2310069B03Rik		IAPEY3-int:ERVK:LTR
2610001J05Rik	2410006H16Rik		IAPEY_LTR:ERVK:LTR
2700038G22Rik	2610005L07Rik		IAPEy-int:ERVK:LTR
2900011O08Rik	2810013P06Rik		IAPEz-int:ERVK:LTR
2900026A02Rik	2810047C21Rik1		IAPLTR1_Mm:ERVK:LTR
3830417A13Rik	4930432K21Rik		IAPLTR2_Mm:ERVK:LTR
4930414L22Rik	4930461G14Rik		IAPLTR2a:ERVK:LTR
4930500J02Rik	4930502E18Rik		MMERVK9E_I-int:ERVK:LTR
4930503E14Rik	4930558J18Rik		RLTR13D6:ERVK:LTR
4933409K07Rik	4933411K20Rik		RLTR13E:ERVK:LTR
6330410L21Rik	4933416C03Rik		RLTR26:ERVK:LTR
AI414108	4933427D06Rik		RLTR4_MM-int:ERV1:LTR
AI462493	5430416N02Rik		RLTR4_Mm:ERV1:LTR
AI662270	5430417L22Rik		RLTR9D:ERVK:LTR
AY358078	6330416G13Rik		RLTRETN_Mm:ERVK:LTR
Aass	6430548M08Rik		Tigger17c:TcMar-Tigger:DNA
Abhd17a	6820431F20Rik
Abt1	8430419L09Rik
Acot1	9330182L06Rik
Acta1	9430008C03Rik
Acta2	9930014A18Rik
Actc1	A2m
Acvr2b	AI848285
Adarb2	AW549877
Adat3	Abca5
Ahsa2	Abhd13
Akr1b8	Ablim1
Akt1	Acap1
Amd1	Acsf2
Amd2	Acsl1
Ankrd33b	Acsl6
Anxa1	Acss1
Anxa2	Acss2
Anxa8	Acvr1
Apcdd1	Adam9
Arhgap39	Adc
Arl6ip4	Adck3
Arntl2	Adcy7
Asb4	Adm2
Asb9	Adrbk2
Atg2a	Adssl1
Atp5l	Aga
Aurkc	Agpat5
BC052688	Aig1
Bglap3	Akt3
Bloc1s1	Aldh18a1
Bop1	Aldh1l1
Bspry	Aldh1l2
Btg2	Alpk3
Cactin	Amfr
Calcoco2	Amigo1
Car2	Ank3
Car3	Ano9
Car4	Apobec1
Cbr3	Apobec2
Ccdc86	App
Ccnd2	Arhgap30
Ccno	Arhgef10
Ccrn4l	Arid5a
Cd200	Arl14ep
Cd68	Arnt2
Cdc42ep5	Arrdc2
Cdkn1c	Arrdc3
Ceacam1	Arrdc4
Ceacam2	Arsa
Cend1	Art5
Clec2i	Asah1
Clmp	Asns
Clp1	Atf3
Cmss1	Atg4c
Cnn2	Atp12a
Col1a1	Atp1a2
Col1a2	Atp1b2
Col2a1	Atp2a3
Col3a1	Atp2b2
Commd4	Atp7b
Commd5	Atp8a1
Coq4	Atxn7
Cpsf4l	B3gnt3
Crabp2	B3gnt5
Crmp1	B4galnt2
Crygc	Bai1
Csf1	Bai3
Cthrc1	Bbs10
Ctr9	Bche
Cyp1b1	Bcl11b
Cyp2b23	Bcl6
D5Ertd605e	Bmp4
D630023F18Rik	Bmp7
Ddx17	Bsn
Ddx23	Btg1
Ddx51	C130074G19Rik
Ddx56	C2cd2
Dedd2	C530008M17Rik
Dennd5b	Cabp1
Dido1	Cacna2d2
Dlk1	Cacna2d4
Dll1	Calca
Dnaja1	Calr3
Dnal1	Camk1
Dnmt3b	Camk1d
Dppa3	Camk2n1
Dusp27	Car13
Duxbl3	Carf
Dyrk3	Casp7
Ebna1bp2	Cbln1
Efhb	Cbr4
Ehd1	Ccdc107
Enc1	Ccdc125
Enoph1	Ccdc130
Epcam	Ccdc160
Epha1	Ccdc166
Ephx2	Ccdc36
Eras	Ccdc68
Ermard	Cd79a
Esrp1	Cd97
Exosc4	Cdh1
Fam131b	Cdh22
Fam166a	Cdkn1b
Fam214b	Cdo1
Fam222a	Cdx1
Fam73b	Cdyl2
Fam83h	Cebpb
Fbxl19	Cebpg
Fgfbp1	Cep83os
Fgfr1op	Chac1
Fgfr2	Chd5
Fndc3c1	Chil1
Foxd3	ChkbCpt1b
Frem2	Ciart
Frmd8	Cklf
Ftsj2	Clcn6
Ftsj3	Clybl
Gadd45g	Cmtm3
Gap43	Cngb1
Gas2l1	Cnppd1
Gatsl3	Cntln
Gbp2	Cntrob
Gbx2	Cobl
Gdpgp1	Cobll1
Gja1	Coch
Glrx	Coq10a
Gm10069	Coro2b
Gm10845	Cpe
Gm19757	Cpt1b
Gm20767	Crtac1
Gm21312	Cspg5
Gm5622	Csrnp3
Gm5860	Ctbs
Gm6297	Cth
Gm6763	Ctsc
Gm8267	Cxcl16
Gm9112	Cxcr4
Gpatch4	Cyb5r2
Grhl2	Cyp39a1
Grwd1	Cyp4f13
Gtse1	Cyp4v3
Gtsf1l	Cyp51
H2-Ke2	D430020J02Rik
H2-T24	Ddhd2
Hand1	Ddit3
Heatr2	Ddit4
Hmgcs1	Ddr2
Hn1	Dennd2d
Hoxb1	Dgkh
Hoxb2	Dhrs7
Hpdl	Dleu7
Hras	Dmtn
Hspa5	Dnah1
Hspa8	Dnaic2
Hspd1	Dnajc22
Hspg2	Dnajc4
Hsph1	Dnm1
Ict1	Dok2
Id2	Dsg2
Id3	Dusp4
Ifitm1	Dzip3
Ift22	Ebf1
Igf2	Ecel1
Igf2os	Eda2r
Ina	Efcab11
Ino80b	Eif2s3y
Insm1	Elavl3
Irgm1	Elf4
Itpka	Elmo3
Kcnj14	Elmod2
Khdc3	Elovl2
Kif1a	Elovl4
Kif5a	Elovl7
Klhl13	Emid1
Klhl21	Epdr1
Kng2	Epha7
Knop1	Erdr1
Krt18	Esx1
Krt19	Extl1
Krt7	Faah
Krt8	Fads1
LOC101056136	Fah
Ldlr	Fam129a
Ldoc1	Fam132b
Lef1	Fam134b
Lgals3	Fam149a
Lpar6	Fam63b
Lrp2	Fam81a
Lrrn4	Fam84b
Mat2a	Faxc
Med29	Fbln5
Megf8	Fbxl12
Mep1b	Fbxl16
Midn	Fcgrt
Mir3063	Fgd5
Mknk2	Fgf1
Mmp12	Fgf11
Mmp25	Fgf21
Mob3a	Fgfr4
Mocs3	Fgl2
Mospd3	Fhl4
Mpv17l	Fmnl1
Mrpl18	Fos
Mul1	Foxn4
Mybbp1a	Fry
Myc	Fuk
N6amt2	Fut1
Nav2	Fut9
Ndst1	Fyn
Neb	G0s2
Nefh	Galc
Neurod1	Galnt4
Neurog3	Gas6
Nfkbiz	Gas7
Ngdn	Gch1
Nhp2	Gdf15
Nif3l1	Gdpd1
Nifk	Gen1
Nlrp1a	Ggt1
Nod1	Gja4
Nom1	Gjb2
Notch3	Glt25d1
Nrk	Gm10409
Nt5e	Gm10509
Nubp2	Gm15441
Ogt	Gm1564
Orc1	Gm2694
Pacs1	Gm3002
Paf1	Gm3500
Pbld1	Gm3558
Pcnxl3	Gm364
Pde2a	Gm7325
Peg10	Gnmt
Peg12	Got1l1
Peg3	Gpr137b
Peg3os	Gpr137b-ps
Phb	Gpr19
Phrf1	Gpr20
Phtf1	Gpr56
Pim2	Gprc5a
Pin4	Gpt2
Plac8	Greb1
Plac9b	Grik3
Plk2	Gtf2a1l
Pml	Gulp1
Pmm1	Gyk
Pmp22	Gypc
Pno1	H1f0
Polr2l	H2-Ab1
Pop1	H2-DMa
Pou3f1	H2-L
Ppan	H2-Q10
Ppp1r16a	Hdgfrp3
Prnp	Hdhd1a
Prob1	Hebp1
Prpf38a	Herpud1
Prr12	Hgsnat
Prss23	Hhip
Psma2	Hmha1
Ptk2b	Hnf1a
Ptpn14	Hormad2
Pwp2	Hpgd
Ralgds	Hrk
Ramp3	Hsd17b1
Rbmxl2	Hspb8
Rhox5	Hydin
Rhox6	Icosl
Rhox9	Idua
Ripk1	Ifi30
Rnasek	Ifit2
Rnf41	Igsf21
Rpl39l	Igsf23
Rpp25l	Il10rb
Rrp7a	Il17rc
S100a11	Il1rl2
S100a6	Ildr1
Sall2	Iqgap2
Sbf1	Irak3
Sbk1	Irak4
Scnm1	Irf5
Sdhd	Irf8
Serpina3m	Itfg1
Serpinb9b	Itfg2
Serpine1	Jakmip1
Setd1b	Jdp2
Sf3b5	Kalrn
Sfmbt2	Katnal1
Sfn	Kbtbd11
Sfrp2	Kcng4
Sh3bp5l	Kcnn1
Shank1	Kcns1
Sik1	Kdelr3
Slc16a2	Kifc2
Slc23a1	Kirrel2
Slc25a10	Klf10
Slc2a1	Klf11
Slc38a10	Klf15
Slc5a4b	Klf5
Slc8a2	Klhdc7a
Slc9a3r2	Klhdc8b
Slfn3	Klhl36
Sms	Klk10
Smtnl1	Krcc1
Snapc5	Krt17
Sox15	Krt42
Srsf2	Krtcap3
Sssca1	Ky
Stk16	L1cam
Stk31	Laptm5
Sulf1	Lefty2
Supt4a	Letm2
Taf11	Lifr
Tagln	Lipa
Tbc1d16	Liph
Tcfl5	Lonrf1
Tdrd12	Lpcat2
Tenm4	Lrig2
Tex19.1	Lrrc75a
Thbs1	Lrrc8b
Themis2	Lrrc8d
Tlr2	Lrrn1
Tmem254a	Ltbr
Tmem254b	Ly75
Tmsb4x	Lyrm5
Toe1	Mageb4
Tor4a	Mageh1
Trim25	Map10
Trip10	Mapk4
Trpc6	Matn3
Tsku	Mb21d1
Tuba1a	Mboat2
Tuba4a	Mcf2l
Tubb4b	Mcoln1
Tufm	Mdfic
Tut1	Mdga1
Twf2	Mef2b
U2af1	Mfhas1
Ubfd1	Mfsd6
Uqcrh	Mfsd7a
Urgcp	Mfsd7c
Usf1	Micu3
Uspl1	Mid1
Vav2	Mir1668
Vcan	Mir6516
Vim	Mitf
Vnn1	Mknk1
Vps18	Mlycd
Vrtn	Mmp15
Vwa5a	Mmp17
Wbscr22	Mmp2
Wdr55	Mmp28
Wdr74	Mmp9
Wdyhv1	Morc2b
Wnt7b	Mov10l1
Wsb2	Moxd1
Wt1	Mpc1
Wtip	Mpv17l2
Xkr8	Mras
Zfp229	Msi1
Zfp296	Msl3l2
Zfp365	Mttp
Zfp42	Mtus1
Zfp750	Nadsyn1
Zfp771	Naga
Znhit2	Naglu
	Napb
	Necab2
	Neil3
	Neto2
	Nos3
	Npr3
	Nrarp
	Nrip3
	Ntn1
	Nupr1
	Ocln
	Olfm2
	Optn
	Otub2
	Pacsin1
	Padi3
	Padi4
	Palm3
	Pcdhga1
	Pck2
	Pcnxl2
	Pcolce2
	Pcsk9
	Pde4dip
	Pde8a
	Pde9a
	Pdgfra
	Pdgfrb
	Pdgfrl
	Pdha2
	Pdyn
	Pecam1
	Peg13
	Pex26
	Phlpp1
	Pkia
	Pla2g5
	Pld2
	Plek2
	Plekha6
	Plekhg4
	Plekhh1
	Plekhh3
	Plet1
	Plvap
	Plxdc1
	Plxna2
	Plxnd1
	Poli
	Polr3gl
	Porcn
	Ppapdc1b
	Ppapdc2
	Ppm1e
	Ppm1l
	Ppp1r3b
	Ppp1r3c
	Ppp3cc
	Pramel1
	Primpol
	Prkaa2
	Prkcb
	Prph
	Prrg1
	Prrx2
	Prss35
	Psd4
	Ptprcap
	Pvt1
	Pwwp2b
	Pxylp1
	Pycr1
	Pygm
	Rab11fip2
	Rab43
	Rabgap1l
	Rap1gap2
	Rapgef3
	Rasa3
	Rassf1
	Rbl1
	Rfesd
	Rfx3
	Rgs20
	Rgs3
	Rgs9bp
	Rhbdd1
	Ripply1
	Ripply3
	Rln3
	Rnf103
	Rnf122
	Rnf130
	Rnf144a
	Rnf144b
	Rnf157
	Rnf166
	Rnf170
	Robo1
	Robo4
	Rps6ka2
	Rras
	Runx3
	Sat1
	Satb2
	Scd1
	Scn3a
	Sdr39u1
	Sema4g
	Sema5b
	Serinc2
	Serpinf1
	Serpinh1
	Sfrp1
	Sfrp4
	Sgcb
	Sh2d4a
	She
	Siah2
	Sil1
	Sipa1l2
	Slc11a1
	Slc15a1
	Slc16a10
	Slc16a14
	Slc16a6
	Slc19a3
	Slc1a1
	Slc1a4
	Slc1a5
	Slc25a36
	Slc2a4
	Slc35d2
	Slc37a2
	Slc38a8
	Slc38a9
	Slc39a4
	Slc3a2
	Slc41a3
	Slc43a2
	Slc6a1
	Slc6a9
	Slc7a1
	Slc7a5
	Slc7a7
	Slc9a5
	Smad1
	Smc1b
	Smim19
	Smyd1
	Snhg1
	Snhg12
	Snhg5
	Snhg7
	Sorl1
	Sox7
	Spag16
	Spin4
	Srgap1
	Srgn
	Srrm4os
	St8sia6
	Stag3
	Stambpl1
	Stard5
	Stat5b
	Stc2
	Steap1
	Steap2
	Stk32a
	Stom
	Strip2
	Stxbp5
	Susd3
	Susd5
	Syde1
	Tacc1
	Taok3
	Tbc1d12
	Tceanc
	Tdrkh
	Tead4
	Tex14
	Tex21
	Tex40
	Tgm2
	Thnsl2
	Thy1
	Timp2
	Tktl2
	Tldc1
	Tm6sf1
	Tm7sf2
	Tmc7
	Tmed3
	Tmem108
	Tmem125
	Tmem158
	Tmem161a
	Tmem175
	Tmem179
	Tmem181c-ps
	Tmem194b
	Tmem198b
	Tmem209
	Tmem229b
	Tmem246
	Tmem45a
	Tmem62
	Tmem63a
	Tmtc4
	Tnfrsf11a
	Tnfrsf1b
	Trf
	Trib3
	Trim34a
	Trim52
	Trim56
	Trim66
	Trim68
	Triml1
	Triml2
	Trpa1
	Trps1
	Tsc22d3
	Tspo2
	Tspyl4
	Tspyl5
	Ttc17
	Ttc21b
	Tuba3a
	Tubg2
	Tulp2
	Txndc16
	Txnip
	Ubap1l
	Uggt2
	Ulbp1
	Usp11
	Vax2
	Vax2os
	Vegfa
	Vegfc
	Vil1
	Vldlr
	Vwf
	Wipi1
	Wls
	Wwox
	Wwtr1
	Xkr5
	Xlr3a
	Xlr5a
	Zadh2
	Zap70
	Zc3h6
	Zc3h8
	Zfp119b
	Zfp521
	Zfp536
	Zfp711
	Zfp839
	Zfp948
	Zmat4
