# Supplementary material for: A CRISPR knockout screen identifies SETDB1-target retroelement silencing factors in embryonic stem cells
Source: HighWire-hosted journal article supplement (doi:10.1101/gr.227280.117), 2018-05-04
Supplement: Supplemental_Table_S4.xlsx [file Supplemental_Table_S4.xlsx]

## Sheet: Sheet1
Supplemental Table S4: Oligonucleotide used in this study
Application	Target	Fw	Rv
gRNA	Setdb1	CACCGACTTACGTGGTCGGCAAAT	AAACATTTGCCGACCACGTAAGTC
gRNA	Atf7ip	CACCGGAAAAACTCGCACCCACCG	AAACCGGTGGGTGCGAGTTTTTCC
gRNA	Dnmt1	CACCGGTTAGGGTCGTCTAGGTGC	AAACGCACCTAGACGACCCTAACC
gRNA	Smarcb1	CACCGCGGCGCTTACTCACCACAA	AAACTTGTGGTGAGTAAGCGCCGC
gRNA	Trim28	CACCGGGGGACGACGCGGCTGCAG	AAACCTGCAGCCGCGTCGTCCCCC
gRNA	Daxx	CACCGGTTGATCCGCCTCTTCGGG	AAACCCCGAAGAGGCGGATCAACC
gRNA	Atrx	CACCGGGGACCGAGAGATTGCCGG	AAACCCGGCAATCTCTCGGTCCCC
gRNA	Smarca4	CACCGGATAAGCAGTCCGCCCTCA	AAACTGAGGGCGGACTGCTTATCC
gRNA	Smarcc1	CACCGTTTCGCCGGCAAGCAGTGC	AAACGCACTGCTTGCCGGCGAAAC
gRNA	Sae1	CACCGACCTGTTCGTGGTCCAGCA	AAACTGCTGGACCACGAACAGGTC
gRNA	Actl6a	CACCGTCGTGGACTGGAATCGCAG	AAACCTGCGATTCCAGTCCACGAC
gRNA	Morc2a	CACCGCATTGCTCGAAGTAGATGC	AAACGCATCTACTTCGAGCAATGC
gRNA	Zfp445	CACCGAGGAGCCGACATTAGTCAA	AAACTTGACTAATGTCGGCTCCTC
gRNA	Smarce1	CACCGGCTGAGGATCCAGACGGTA	AAACTACCGTCTGGATCCTCAGCC
gRNA	Dmap1	CACCGCATGATGACGCATGGACTA	AAACTAGTCCATGCGTCATCATGC
gRNA	Mbd1	CACCGTCCGTCTCTGACAGCGAGT	AAACACTCGCTGTCAGAGACGGAC
gRNA	Dgcr8	CACCGTTACCAACACTCCCGCCAA	AAACTTGGCGGGAGTGTTGGTAAC
gRNA	2810474O19Rik	CACCGATCTCATAATCCCGACGGA	AAACTCCGTCGGGATTATGAGATC
gRNA	Gins2	CACCGTCAGCAGACACTCGAAGCT	AAACAGCTTCGAGTGTCTGCTGAC
gRNA	D2Wsu81e	CACCGCGGCCTTACACTCTGAGTG	AAACCACTCAGAGTGTAAGGCCGC
gRNA	Ago2	CACCGCGCCCTCCATCCTCTACGG	AAACCCGTAGAGGATGGAGGGCGC
gRNA	Ogt	CACCGACACAGCCGAGATTACTCC	AAACGGAGTAATCTCGGCTGTGTC
gRNA	Nacc1	CACCGACCCCAATGTCTGCGCTAC	AAACGTAGCGCAGACATTGGGGTC
gRNA	Atmin	CACCGGTGCGGTTCTGCTGGCGTA	AAACTACGCCAGCAGAACCGCACC
gRNA	Gid8	CACCGGTGTTTCTAGGTCCACACT	AAACAGTGTGGACCTAGAAACACC
gRNA	Arid1a	CACCGTTGCCCGAAGCCGTAGGCT	AAACAGCCTACGGCTTCGGGCAAC
gRNA	Nudcd3	CACCGGCCACCCTTCGGACCGCAT	AAACATGCGGTCCGAAGGGTGGCC
gRNA	1700019D03Rik	CACCGAATATAGGACACCTTCTCC	AAACGGAGAAGGTGTCCTATATTC
gRNA	Ep400	CACCGCCAGTGAGATTTCGGGCGT	AAACACGCCCGAAATCTCACTGGC
gRNA	Cramp1l	CACCGCGGGCCGCGAGGAAAAGGT	AAACACCTTTTCCTCGCGGCCCGC
gRNA	AI846148	CACCGCTTTCTGCAGTAACCCAAC	AAACGTTGGGTTACTGCAGAAAGC
gRNA	Masp1	CACCGCGATTTTCCCGTACACAGG	AAACCCTGTGTACGGGAAAATCGC
gRNA	Zfp592	CACCGTCGGGGGAAATCAAACGGA	AAACTCCGTTTGATTTCCCCCGAC
gRNA	Sdr42e1	CACCGACTCCGGACCTGCGCCATC	AAACGATGGCGCAGGTCCGGAGTC
gRNA	Trmt61a	CACCGCAACGGGCGGACAAGGCCC	AAACGGGCCTTGTCCGCCCGTTGC
gRNA	Gpsm3	CACCGTTCCTCTAGGCGGCGGGAC	AAACGTCCCGCCGCCTAGAGGAAC
gRNA	E2f4	CACCGCCAACGTGCTGGAAGGCAT	AAACATGCCTTCCAGCACGTTGGC
gRNA	Acd	CACCGCCGTGTTACTTGTGTCAGA	AAACTCTGACACAAGTAACACGGC
gRNA	Cyp4x1	CACCGGGATGTCCTGATGGAATGC	AAACGCATTCCATCAGGACATCCC
gRNA	Trim28	CACCGGTCCTGGTACGAACTCCAC	AAACGTGGAGTTCGTACCAGGACC
gRNA	Trip12	CACCGGTTCTGGGTCCGAATCAAC	AAACGTTGATTCGGACCCAGAACC
gRNA	Lasp1	CACCGGGCCTCCAGGTGCGCTACA	AAACTGTAGCGCACCTGGAGGCCC
gRNA	Fn3krp	CACCGTTGGGTCGAATTCTATGCC	AAACGGCATAGAATTCGACCCAAC
gRNA	Huwe1	CACCGAACAGGGTCGTTGGTACCG	AAACCGGTACCAACGACCCTGTTC
gRNA	Cecr6	CACCGCCCTACGGCCGGAGCGAGT	AAACACTCGCTCCGGCCGTAGGGC
gRNA	Zkscan7	CACCGCCTACCTCAACCTCCAATC	AAACGATTGGAGGTTGAGGTAGGC
gRNA	Tbc1d10b	CACCGACAGGAGCCGAGACGTCGG	AAACCCGACGTCTCGGCTCCTGTC
gRNA	Dolpp1	CACCGCAGCAGTGGGCACTAAGTA	AAACTACTTAGTGCCCACTGCTGC
gRNA	Glis3	CACCGTCTTGCAAAATAACGGACC	AAACGGTCCGTTATTTTGCAAGAC
gRNA	Ppm1b	CACCGCAGTTTATGACGGTCATGC	AAACGCATGACCGTCATAAACTGC
gRNA	Slc27a4	CACCGTGAAGGTACCGTCGCACCT	AAACAGGTGCGACGGTACCTTCAC
gRNA	Pcdh19	CACCGAAGCTCGCTATTGACCGAC	AAACGTCGGTCAATAGCGAGCTTC
gRNA	Tmem231	CACCGCACGTTCCCCACCTTCAAC	AAACGTTGAAGGTGGGGAACGTGC
gRNA	Ccdc146	CACCGAGCAACCTTTCAGCTAGCG	AAACCGCTAGCTGAAAGGTTGCTC
gRNA	Icam1	CACCGCGAGCTTTGGGATGGTAGC	AAACGCTACCATCCCAAAGCTCGC
gRNA	2610008E11Rik	CACCGCGTTATGCACTAACCTGGA	AAACTCCAGGTTAGTGCATAACGC
gRNA	P4ha2	CACCGACCCAAGCCACGAACGAGC	AAACGCTCGTTCGTGGCTTGGGTC
gRNA	Svil	CACCGACCAGCTTGGTGGCGTCCC	AAACGGGACGCCACCAAGCTGGTC
gRNA	Slc16a2	CACCGAAGATGGAGCCGTTGCACC	AAACGGTGCAACGGCTCCATCTTC
gRNA	Fam118b	CACCGAGTGCTGCGGTTGCACCGC	AAACGCGGTGCAACCGCAGCACTC
gRNA	Rtn2	CACCGCATTCTCACTGGAAAGGGT	AAACACCCTTTCCAGTGAGAATGC
gRNA	Crb3	CACCGGCTATTGTAGCCATCACTG	AAACCAGTGATGGCTACAATAGCC
gRNA	Pom121	CACCGCGGGAGGGTCGCAAAAGCG	AAACCGCTTTTGCGACCCTCCCGC
gRNA	Pard6b	CACCGGGCTACGCAGATATCCACG	AAACCGTGGATATCTGCGTAGCCC
gRNA	Ube4b	CACCGAATGGCGAAACTCGTGAAG	AAACCTTCACGAGTTTCGCCATTC
gRNA	Zfp217	CACCGATCACAGCTCAACTCCTCG	AAACCGAGGAGTTGAGCTGTGATC
gRNA	Aqp3	CACCGACAATCCCAGCGCCCAAGA	AAACTCTTGGGCGCTGGGATTGTC
gRNA	Rnmtl1	CACCGAGCCGTCTGGAGTACGTCA	AAACTGACGTACTCCAGACGGCTC
gRNA	Carm1	CACCGTGGTCCGGCGCGCACCTCA	AAACTGAGGTGCGCGCCGGACCAC
gRNA	Zfc3h1	CACCGTCGAAAGCGGAAACGGTCC	AAACGGACCGTTTCCGCTTTCGAC
gRNA	Cldn8	CACCGTCCGGCTGTCAGCAAGATG	AAACCATCTTGCTGACAGCCGGAC
gRNA	Cln8	CACCGTGTTGGTTTCACATCACCA	AAACTGGTGATGTGAAACCAACAC
gRNA	Spin1	CACCGAGCCTACGATGTTCCGCCG	AAACCGGCGGAACATCGTAGGCTC
gRNA	Kdm5c	CACCGTATGCCGAATGTGTTCCCG	AAACCGGGAACACATTCGGCATAC
gRNA	Stk36	CACCGTCGCGGTGTAGGATGCGGT	AAACACCGCATCCTACACCGCGAC
gRNA	Lhfp	CACCGCGACACGCAGCAACCCATC	AAACGATGGGTTGCTGCGTGTCGC
gRNA	Ephx4	CACCGTCCTGATCGGCCATGACTG	AAACCAGTCATGGCCGATCAGGAC
gRNA	0610009B22Rik	CACCGCCACATGTTTTCGTCGACG	AAACCGTCGACGAAAACATGTGGC
gRNA	Dhps	CACCGCACCATGTTGTGCTGCACG	AAACCGTGCAGCACAACATGGTGC
gRNA	Skor2	CACCGCGTCATCGTCGTCGAAGCG	AAACCGCTTCGACGACGATGACGC
gRNA	Scn1b	CACCGAGTGGACCTTCCGCCAGAA	AAACTTCTGGCGGAAGGTCCACTC
gRNA	H2-T24	CACCGCTGTGAGATGCGGTACAAC	AAACGTTGTACCGCATCTCACAGC
gRNA	Myc	CACCGTGTCCCCGAGCCGCCGCTC	AAACGAGCGGCGGCTCGGGGACAC
gRNA	Cdc42bpb	CACCGGGCAACTCAAACCGCGACA	AAACTGTCGCGGTTTGAGTTGCCC
gRNA	Abhd8	CACCGGCTGCGGGTAAAGCATGCG	AAACCGCATGCTTTACCCGCAGCC
gRNA	Pot1a	CACCGTACGATAACCACGTTCAAG	AAACCTTGAACGTGGTTATCGTAC
gRNA	Terf1	CACCGTGTGCCGAGCCTTCCGTGA	AAACTCACGGAAGGCTCGGCACAC
gRNA	Fnbp4	CACCGCTGATCCATTTGATGCGGT	AAACACCGCATCAAATGGATCAGC
gRNA	Tmc8	CACCGATCCGCACAGGCGTCCGGG	AAACCCCGGACGCCTGTGCGGATC
gRNA	Lias	CACCGTGGAGGTAGTCTTAGCCTA	AAACTAGGCTAAGACTACCTCCAC
gRNA	Itga2b	CACCGCGTATCGGGTGCCCCCACT	AAACAGTGGGGGCACCCGATACGC
gRNA	Irf7	CACCGCATTTCGGTCGTAGGGATC	AAACGATCCCTACGACCGAAATGC
gRNA	Cyp2c29	CACCGTGGCTGAAAAAATTATTAA	AAACTTAATAATTTTTTCAGCCAC
gRNA	Hnf4g	CACCGATCATACCTGGTCATCCAA	AAACTTGGATGACCAGGTATGATC
gRNA	Tubb6	CACCGAGCTAAGAAGTACGTACCC	AAACGGGTACGTACTTCTTAGCTC
gRNA	Inf2	CACCGGGATATTCTGACCCGGCTA	AAACTAGCCGGGTCAGAATATCCC
gRNA	Mpp8 #1	CACCGTGTCAGTTCCCGACAGCAT	AAACATGCTGTCGGGAACTGACAC
gRNA	Mpp8 #2	CACCGAAAGGAACGGTGGCCGTTG	AAACCAACGGCCACCGTTCCTTTC
gRNA	Pphln1 #1	CACCGGAATCCCCTGTCGGCCGGA	AAACTCCGGCCGACAGGGGATTCC
gRNA	Pphln1 #2	CACCGGAGGGTGACGCATCTCTCG	AAACCGAGAGATGCGTCACCCTCC
RT-qPCR	Hprt	CAGGCCAGACTTTGTTGGAT	TTGCGCTCATCTTAGGCTT
RT-qPCR	GFP	AGCAAAGACCCCAACGAGAA	GGCGGCGGTCACGAA
RT-qPCR	Morc2a	TACCTCCAAGTTTCCCCATC	AATCAGCACGGCTTTGGTAG
RT-qPCR	Fkbp6	ATAGGCTGGCTTGAACAGGA	TACCTGGAGCACATGGACAA
RT-qPCR	Dazl	CTTCTGCACATCCACGTCATTA	TCTTTGCCAGATATGGCTCAGT
RT-qPCR	Max	ATGACATCGAGGTGGAGAGC	GTCCCTACGTTTTCGTTCCA
RT-qPCR	LINE1	TTTGGGACACAATGAAAGCA	CTGCCGTCTACTCCTCTTGG
RT-qPCR	IAP	AAGCAGCAATCACCCACTTTGG	AAGCAGCAATCACCCACTTTGG
RT-qPCR	MMERVK10C	CAAATAGCCCTACCATATGTCAG	GTATACTTTCTTCTTCAGGTCCAC
RT-qPCR	MusD/ETn	GTGGTATCTCAGGAGGAGTGCC	GGGCAGCTCCTCTATCTGAGTG
RT-qPCR	RLTR4	ACAAAGGCCTCCTCACTTCT	TGCCCTCATCTTCTGATAGC
ChIP-qPCR	Gapdh	ATCCTGTAGGCCAGGTGATG	AGGCTCAAGGGCTTTTAAGG
ChIP-qPCR	MSCV	AACCATCAGATGTTTCCAGGGTG	TTCGGATGCAAACAGCAAGAGGC
ChIP-qPCR	Fkbp6	AAACGGCACGTGATCGATAG	CCGCATAAAATGCTTTGTCC
ChIP-qPCR	Dazl	GCCTCGTGACGTGCTACAG	GCCGAGACCCTTACGTAGAT
ChIP-qPCR	Mael	GTGGGGAGAGCACTGTGATT	GTTCGGGAATGTGAAACACC
ChIP-qPCR	Taf7l	CTCCCTCAGTGGGTGCTTC	AGGCGACGTGTCTCGTTAGT
ChIP-qPCR	Sycp1	AAGACGACATGGAACGGAAC	CAGCTGGACCAACCGTTAAA
ChIP-qPCR	Meg3	GACAGTCAGTGCCCCAGATC	TCCTCGCTAGTTCACGGAGG
ChIP-qPCR	Air	TCCTTGGTTGTGCTGAGTTG	GCTTCGCACCCTCAGGATAG
ChIP-qPCR	H19	CAGATCTGGCTAGCTTGAGGA	TACCCCAGGTTCAACAAAGG
ChIP-qPCR	Kcnq1ot1	CGAATCACCTCTGCTTCTGG	GAGTCAGCACGGCACAAGT
ChIP-qPCR	Peg13	GAATGCAGGCAGCTGTGAC	GTGTCTCCACCGAGCAGATT
ChIP-qPCR	Nap1l5	AGAGGTCCTGCAGCTGTGAT	AGTGAGCAGCCATTCACTTG
ChIP-qPCR	Plagl1	AGCCAGAGATGCAGCAAAAG	CTTAAGTGCCGCATAGCACA
ChIP-qPCR	Nnat	CGGGACCCCTTAATCCATA	GCGGGGACAAATAGTACCAC
ChIP-qPCR	ETn	GTGGTATCTCAGGAGGAGTGCC	GGGCAGCTCCTCTATCTGAGTG
ChIP-qPCR	L1MdT 5'UTR	ACCCGCCGAACTTAGGAAAT	CTTCCGCCTGTTCCAGAAG
ChIP-qPCR	L1MdT ORF1	ACTCAAAGCGAGGCAACACT	CTTTGATTGTTGTGCCGATG
ChIP-qPCR	L1MdT ORF2	TTTGGGACACAATGAAAGCA	CTGCCGTCTACTCCTCTTGG
ChIP-qPCR	L1MdT 3'UTR	ACAAAACACCCATGGAAGGA	CAGCGTTTGGATGCTGATTA
Bisulfite sequencing	MSCV	AGGGTGTTTTAAGGATTTGAAATGATTTTGTG	TCTCCTACCAAAACCACATATCCTAAC
Bisulfite sequencing	ETn	AAATTTGAGTTTTGATTAGTATGAAATTGT	AATCTAATATTTCTTCTTCCTTAAACCATA
